## **NAD<sup>+</sup> repletion rescues female fertility during reproductive ageing**

Michael J. Bertoldo<sup>1,2§†</sup>, Dave R. Listijono<sup>1,2§†</sup>, Wing-Hong Jonathan Ho<sup>1,2§†</sup>, Angelique H. Riepsamen<sup>2</sup>, Xing L. Jin<sup>3</sup>, Kaisa Selesniemi<sup>4,5†</sup>, Dale M. Goss<sup>1†</sup>, Saabah Mahbub<sup>6</sup>, Jared M. Campbell<sup>6</sup>, Abbas Habibalahi<sup>6</sup>, Wei-Guo Nicholas Loh<sup>2</sup>, Neil A. Youngson<sup>1</sup>, Jayanthi Maniam<sup>1</sup>, Ashley S.A. Wong<sup>1</sup>, Dulama Richani<sup>2</sup>, Catherine Li<sup>1</sup>, Yiqing Zhao<sup>2</sup>, Maria Marinova<sup>2</sup>, Lynn-Jee Kim<sup>1</sup>, Laurin Lau<sup>2</sup>, Rachael M Wu<sup>7</sup>, A. Stefanie Mikolaizak<sup>8</sup>, Toshiyuki Araki<sup>9</sup>, David G. Le Couteur<sup>10</sup>, Nigel Turner<sup>1</sup>, Margaret J. Morris<sup>1</sup>, Kirsty A. Walters<sup>2</sup>, Ewa Goldys<sup>6</sup>, Christopher O'Neill<sup>3</sup>, Robert B. Gilchrist<sup>2†</sup>, David A. Sinclair<sup>1,4\*#†</sup>, Hayden A. Homer<sup>2,11\*#†</sup>, Lindsay E. Wu<sup>1\*#†</sup>

<sup>1</sup>School of Medical Sciences, UNSW Sydney, NSW 2052, Australia

<sup>2</sup>School of Women's and Children's Health, UNSW Sydney, NSW 2052, Australia

<sup>3</sup>Human Reproduction Unit, Kolling Institute, Sydney Medical School, The University of Sydney, Sydney NSW Australia

<sup>4</sup>Paul F Glenn Laboratories for the Biological Mechanisms of Aging, Harvard Medical School, Boston MA, United States of America

<sup>5</sup>Jumpstart Fertility Inc., Boston MA, United States of America

<sup>6</sup>ARC Centre of Excellence in Nanoscale Biophotonics, UNSW Sydney, NSW 2052, Australia

<sup>7</sup>Graduate Entry Medical School, University of Limerick, Republic of Ireland

<sup>8</sup>Neuroscience Research Australia, Barker St, Randwick, NSW 2031 Australia

<sup>9</sup>Department of Peripheral Nervous System Research, National Institute of Neuroscience, National Center of Neurology and Psychiatry, 4-1-1 Ogawa-higashi, Kodaira, Tokyo 187-8502 Japan

<sup>10</sup>ANZAC Medical Research Institute, The University of Sydney, Concord, NSW 2139, Australia

<sup>11</sup>Christopher Chen Oocyte Biology Laboratory, University of Queensland Centre for Clinical Research, Royal Brisbane & Women's Hospital, Herston, Queensland 4029, Australia

\*To whom correspondence should be addressed:

[lindsay.wu@unsw.edu.au](mailto:lindsay.wu@unsw.edu.au)

[h.homer@uq.edu.au](mailto:h.homer@uq.edu.au)

[david\\_sinclair@hms.harvard.edu](mailto:david_sinclair@hms.harvard.edu)

§:#These authors contributed equally to this work.

†Denotes authors with involvement in Jumpstart Fertility Pty Ltd through direct employment, indirect salary support, sponsored research lab support, shareholding or directorship.

## 1 **Abstract**

2

3 Female infertility is a common and devastating condition with life-long health, emotional and  
4 social consequences. There is currently no pharmacological therapy for preserving oocyte  
5 quality during aging, which is the strongest risk factor for infertility. This leads to an age  
6 dependent decline in natural conception and IVF success rates (1). Here, we show that this is  
7 due in part to declining levels of the metabolic cofactor nicotinamide adenine dinucleotide  
8 (NAD<sup>+</sup>), and that restoring NAD<sup>+</sup> levels with its metabolic precursor nicotinamide  
9 mononucleotide (NMN) rejuvenates oocyte quality and quantity in aged animals, leading to  
10 improved fertility. These benefits extend to the developing embryo, where NMN  
11 supplementation in embryo culture media following IVF enhances blastocyst formation in  
12 older mice. The NAD<sup>+</sup> dependent deacylase SIRT2 is sufficient, but not essential, to  
13 recapitulate the benefits of *in vivo* NMN treatment, and transgenic overexpression of SIRT2  
14 maintains oocyte spindle assembly, accurate chromosome segregation, decreased oxidative  
15 stress and overall fertility with ageing. Pharmacological elevation of NAD<sup>+</sup> may be an  
16 effective, non-invasive strategy for restoring and maintaining female fertility during ageing,  
17 and for improving the success of IVF.

18

19

## 20 **Introduction**

21 Across the developed world, there is a trend for delaying pregnancy until later in life for socio-  
22 economic reasons (2). This older age of parenthood is increasingly conflicting with age-  
23 dependent barriers to female fertility (1, 3), leading to increased demand for infertility  
24 treatments, including assisted reproduction technologies (ART) such as *in vitro* fertilisation  
25 (IVF). Resorting to this procedure has several disadvantages, as it is invasive, carries health

1 risks (4), is expensive and has a limited success rate. Repeated IVF failures are a substantial  
2 source of emotional distress, and failure to conceive offspring is a substantial source of  
3 relationship breakdown (5).

4

5 The rate-limiting factors for successful pregnancies in IVF are oocyte quantity and quality,  
6 both of which start to decline from the middle of the third decade of life in humans (1, 3).  
7 Despite the enormous need, there are no clinically viable strategies to either preserve or  
8 rejuvenate oocyte quantity or quality during ageing. There is a major need in reproductive  
9 medicine for a non-invasive, pharmacological treatment to maintain or restore oocyte quantity  
10 and/or quality during ageing. The effect of such a therapy would be to alleviate a rate-limiting  
11 barrier to IVF success, or increase the chances of unaided conception, without having to resort  
12 to IVF.

13

14 The molecular basis for the decline in oocyte quality with advancing age is not clear but is  
15 certainly multifactorial. The key factors thought to be involved include genome instability,  
16 reduced mitochondrial bioenergetics, increased reactive oxygen species (ROS), and impaired  
17 fidelity during meiotic chromosome segregation due to disrupted spindle assembly and  
18 compromised function of the spindle assembly checkpoint (SAC) surveillance system (6). This  
19 latter hypothesis is evidenced by an increased rate of aneuploidy in embryos with increased  
20 maternal age (7), and the increased incidence of offspring born with chromosomal  
21 abnormalities such as Trisomy 21 (8), which causes Down's Syndrome. The molecular cause  
22 of chromosome mis-segregation in oocytes with advancing age is still unknown, and as a result  
23 there are no pharmacological strategies to correct this problem. Understanding the molecular  
24 basis of this defect could lead to therapies which could maintain, or even rescue female fertility  
25 with advancing age.

1

2 Molecular defects in oocytes during ageing closely resemble the pathophysiology of somatic  
3 cell ageing, which is similarly characterised by epigenetic dysfunction and genome instability  
4 (9), declining mitochondrial bioenergetics (10), and impaired chromosome segregation leading  
5 to senescence (11). Given these common features, reproductive decline could be viewed  
6 through the same lens as somatic ageing. While somatic tissues undergo continual renewal  
7 through turnover of cells that can be replaced by a self-renewing population of resident  
8 precursor stem cells, primordial follicles in the ovary are laid down during *in utero*  
9 development in humans, where they form a finite pool that does not undergo self-renewal and  
10 cannot be replenished. Oocytes are therefore the oldest cells in the body: given this, it is  
11 unsurprising that while the somatic cells of a 35 year old female will have turned over many  
12 times in her lifetime, some being only days old, oocytes that were formed 35 years earlier in  
13 primordial follicles during fetal development will be highly susceptible to age-related  
14 dysfunction.

15

16 One key mechanism of ageing that has come to light in recent years is the role of nicotinamide  
17 adenine dinucleotide (NAD<sup>+</sup>), a prominent redox cofactor and enzyme substrate that is  
18 essential to driving the electron transport chain for oxidative phosphorylation, and for other  
19 catabolic processes throughout the cell. NAD<sup>+</sup> is also used as a substrate for enzymes such as  
20 the poly-ADP ribose polymerases (PARPs) and the sirtuins that carry out DNA repair and  
21 maintain epigenetic homeostasis. Levels of this essential cofactor decline with age in somatic  
22 tissues (12), and reversing this decline through the administration of metabolic precursors for  
23 NAD<sup>+</sup> has gained attention as a treatment for disease and strategy for maintaining late life  
24 health (13, 14). In this study, we sought to investigate the role of NAD<sup>+</sup> in the age-dependent

1 decline in fertility and to delineate the role of NAD<sup>+</sup> and the NAD<sup>+</sup> consuming enzyme SIRT2  
2 in oocyte quality, post-fertilisation embryo development and fertility.

3

4

5

## 6 **Results**

7

8 *Pharmacological and genetic elevation of NAD<sup>+</sup> enhances oocyte quality, embryo*  
9 *development, and litter size*

10 In somatic tissues, levels of the metabolite NAD<sup>+</sup> decline with age (10, 12, 15), and this decline  
11 is thought to drive some aspects of physiological dysregulation during ageing. Here, we sought  
12 to determine whether this metabolite similarly declined in reproductive tissue with age, and  
13 whether this contributed to infertility and declining oocyte integrity, given that these are the  
14 oldest cells in the body. To address these questions, we used mice, whose fertility starts to  
15 decline around 8 months of age due to oocyte defects that are similar to humans (6). We  
16 observed a steep decline in NAD<sup>+</sup> levels in the ovaries of wild-type mice from the age of 4  
17 months (Fig. 1a, Extended Data Fig. 1), which occurred at a much earlier age than has been  
18 described for other tissues (10, 12, 15), consistent with the vulnerability of ovarian function to  
19 ageing. We hypothesised that restoring NAD<sup>+</sup> levels using nicotinamide mononucleotide  
20 (NMN) (16), the immediate metabolic precursor to NAD<sup>+</sup>, would raise NAD<sup>+</sup> in the ovary and  
21 restore oocyte quality during ageing. Treatment with NMN by oral gavage raised NAD<sup>+</sup> levels  
22 in the ovaries of 10-month old mice (Fig. 1b), suggesting that this could be one strategy for  
23 partially reversing the age-related decline in ovarian NAD<sup>+</sup>.

24

1 In addition to changes in NAD<sup>+</sup> levels in the whole ovary, we next sought to determine whether  
2 there was an age-related decline in NAD<sup>+</sup> levels from individual oocytes, and whether oral  
3 NMN treatment could reverse this decline. Accurately measuring NAD<sup>+</sup> levels in individual  
4 oocytes presents analytical challenges due to small sample size, and so we utilised  
5 hyperspectral microscopy imaging techniques that exploit the natural fluorescence of NADH  
6 and NADPH of individual oocytes. Hyperspectral imaging of autofluorescence allows the  
7 characterisation of the most abundant cellular fluorophores, including NADH and flavins (17).  
8 The former cannot be spectrally distinguished from NADPH and both are collectively referred  
9 to as NAD(P)H, however the autofluorescence of intracellular NADH levels represents the  
10 majority of the NAD(P)H signal (18). We treated twelve-month old females with NMN in  
11 drinking water (2 g/L) for 4 weeks. At the end of treatment, mature MII oocytes were recovered  
12 from the reproductive tracts of females treated with pregnant mare's serum gonadotropin  
13 (PMSG) and human chorionic gonadotropin (hCG). Individual oocytes were then subjected to  
14 multispectral microscopy imaging of autofluorescence, followed by unsupervised spectral  
15 unmixing to determine the relative abundances of the key native fluorophores, NAD(P)H and  
16 FAD, as well as their ratios (Fig. 1c). Consistent with our hypothesis, NAD(P)H levels declined  
17 in oocytes from aged (12-month-old) animals, compared to young (4-5-week old) animals, and  
18 oral delivery of NMN increased NAD(P)H levels in oocytes from aged animals (Fig. 1d).

19  
20 To test whether addressing the age-related decline in NAD<sup>+</sup> would alter oocyte integrity, we  
21 treated 14-month old females with NMN via addition to their drinking water (2 g/L) for 4  
22 weeks. To assess the effects of this intervention on oocyte integrity, GV stage oocytes were  
23 collected from the ovaries of these animals following stimulation with PMSG, matured *in vitro*  
24 to MII, and immunostained to assess spindle structure and chromosome alignment. NMN  
25 treatment notably rescued spindle assembly (Fig. 2a), and oocyte yield in aged animals

1 following ovarian hyperstimulation in two strains (C57BL6 and Swiss albino) of mice (Fig.  
2 2b, c). Obesity is also a physiological challenge that results in reduced NAD<sup>+</sup> (16) and infertility  
3 (19), and in obese animals maintained on a high fat diet (HFD) for 5-6 months (Extended Data  
4 Fig. 3), NMN also increased oocyte yield (Fig. 2d; Extended Data Fig. 2d).

5  
6 To further test the importance of NAD<sup>+</sup> biosynthesis, we studied transgenic strains of animals  
7 which over-express the NAD<sup>+</sup> biosynthetic enzymes NMNAT1 or NMNAT3 (Fig. 2e, f;  
8 Extended Data Fig. 4) (20), which are localised to the nucleus and the mitochondria,  
9 respectively (21), at the age of 12-14 months. As with NMN treatment, *Nmnat1*<sup>Tg/+</sup> animals  
10 yielded more oocytes than their *Nmnat1*<sup>+/+</sup> wild-type littermates (Fig. 2e). In contrast, there  
11 was no change in oocyte yield from *Nmnat3*<sup>Tg/+</sup> animals (Fig. 2f), suggesting that the  
12 subcellular localisation of NAD<sup>+</sup> biosynthesis is important for follicular and oocyte function.  
13 Given the subcellular localisation of NMNAT1 to the nucleus (21), this would suggest that  
14 nuclear NAD<sup>+</sup> synthesis is important to oocyte development, however another recent study  
15 demonstrated an important role for NMNAT2 in oocytes during ageing (22). To test the  
16 requirement for NAD<sup>+</sup> biosynthesis in maintaining normal oocyte function, we next treated GV  
17 stage oocytes with FK866, an inhibitor of the NAD biosynthetic enzyme NAMPT (23), and  
18 assessed meiotic progression (Extended Data Figure 5). Both germinal vesicle breakdown  
19 (GVBD) and polar body extrusion (PBE) were slowed by FK866 treatment, consistent with the  
20 idea that NAD<sup>+</sup> levels are a key determinant of oocyte function.

21  
22 Next, we sought to determine whether these oocytes from aged, NMN treated animals would  
23 have improved performance in embryo development following IVF. Twelve-month old  
24 animals were treated with NMN for 4 weeks (2 g/L, drinking water), MII oocytes were  
25 collected from oviducts following PMSG and hCG stimulation. Oocytes from NMN treated,

1 aged (12-month old) animals had a larger diameter, comparable to oocytes from untreated aged  
2 animals (Fig. 2g). A separate cohort of oocytes were subjected to IVF, and at day 6, the  
3 proportion of embryos that reached blastocyst formation was assessed (Fig. 2h), with a trend  
4 towards improved blastocyst formation rates. We next sought to determine whether *in vivo*  
5 NMN treatment would alter subsequent inner cell mass development of IVF blastocysts, as  
6 inner cell mass size is highly predictive of implantation and pregnancy success (24). Twelve-  
7 month old mice were treated with NMN in drinking water for 2, 7, 14 or 28 days, and subjected  
8 to PMSG and hCG stimulation to promote oocyte release and maturation. These MII oocytes  
9 were collected from the oviduct, and subjected to IVF. At day 6, embryos were fixed, and  
10 subjected to differential staining to identify the inner cell mass. The length of NMN treatment  
11 in animals correlated with improvements in inner cell mass size (Fig. 2i), providing further  
12 evidence that oral treatment with NMN intrinsically enhances oocyte quality. Finally, to  
13 confirm that this translated to improved fertility outcomes, we treated a cohort of animals with  
14 NMN (drinking water, 2 g/L) from 10 weeks of age, and at 18 weeks of age, introduced a male  
15 of proven fertility for timed mating. This was repeated every 7-8 weeks until the age of 50  
16 weeks, during which the number of live pups born per litter was recorded (Fig. 2j). Consistent  
17 with previous experiments, NMN treatment increased litter size from these animals. Overall,  
18 these data from orthogonal pharmacological and genetic approaches show that increasing  
19  $\text{NAD}^+$  enhances ovulation rate, oocyte quality and fertility in aged female mice.

20

21 Given these data suggesting a possible use of an orally delivered  $\text{NAD}^+$  raising therapeutic  
22 such as NMN to improve oocyte quality and fertility, it was important to assess whether this  
23 treatment would adversely affect the health or development of offspring following maternal  
24 NMN exposure. In the experiment shown in Fig. 2j, NMN treatment was maintained in the  
25 lead-up to pregnancy, throughout pregnancy and during lactation. A cohort of these offspring



1 were maintained to determine if there was any change in offspring health from maternal NMN  
2 exposure, and to further uncover whether these offspring would be susceptible to metabolic  
3 vulnerabilities, half of these animals were metabolically challenged with high fat feeding  
4 following their weaning. Offspring were examined for changes in body weight, body  
5 composition, glucose homeostasis, and depression and anxiety-like behaviours (Fig. 3,  
6 Extended Data Fig. 6). There were no changes in any of these parameters from maternal NMN  
7 exposure, indicating normal development, with the exception of a small but consistent increase  
8 in lean body mass from maternal NMN treatment (Fig. 3d). The reason for this change is  
9 unclear, and worthy of later investigation.

10

11 *SIRT2 expression in vivo is sufficient but not necessary to recapitulate benefits to oocyte*  
12 *integrity during ageing*

13 Given the ability of NMN to improve aspects of oocyte quality and fertility following *in vivo*  
14 treatment, we next sought to determine whether particular enzymes that are critically dependent  
15 on NAD<sup>+</sup> levels for their activity could mediate these benefits. One candidate that we  
16 hypothesised for this role is the NAD<sup>+</sup>-dependent deacylase SIRT2. As with all members of  
17 the sirtuin family, the activity of this enzyme is critically dependent upon NAD<sup>+</sup> levels (25),  
18 which decline with age (Fig. 1) (12). We were attracted to this candidate due to its previously  
19 described role in maintaining processes that are essential to oocytes. We previously showed  
20 that the NAD<sup>+</sup> dependent deacylase SIRT2 stabilises the SAC protein BubR1 (26), which is  
21 critical for meiotic progression (27), kinetochore attachment and chromosome segregation in  
22 oocytes (28-30). Hypomorphic BubR1 mutants with decreased levels of BubR1 are infertile  
23 (11), and levels of BubR1 decline in mouse reproductive tissue (26) and human oocytes with  
24 advancing age (31). SIRT2 also maintains genome stability through deacetylation of Cdc20  
25 and Cdh1 required for sustaining the activity of the anaphase-promoting complex (APC) (32),

1 which is an essential oocyte regulator (33, 34). SIRT2 also deacetylates and maintains the  
2 activity of the pentose phosphate pathway enzyme glucose-6-phosphate dehydrogenase  
3 (G6PD) (35), which protects oocytes against oxidative stress by regenerating the cellular  
4 antioxidant glutathione (36).

5

6 To test the idea that SIRT2 was involved in or could recapitulate the benefits of NMN  
7 treatment, we obtained a strain of *Sirt2*<sup>Tg/+</sup> mice (26) which over-express SIRT2 in all tissues  
8 including oocytes (Extended Data Fig. 7a), and assessed oocyte quality at a late reproductive  
9 age of 14 months. As with our previous experiments using *in vivo* NMN treatment in aged  
10 animals, oocytes were immunostained to assess spindle structure and chromosome alignment.  
11 As expected, over 70% of oocytes from reproductively aged wild type (*Sirt2*<sup>+/+</sup>) animals had  
12 strikingly disordered spindles and poorly aligned chromosomes (Fig. 4a, b), whereas 80% of  
13 oocytes from SIRT2 transgenic (*Sirt2*<sup>Tg/+</sup>) littermates exhibited normal barrel-shaped bipolar  
14 spindles and well-aligned chromosomes. Following hyperstimulation with PMSG, twice as  
15 many fully-grown cumulus-enclosed oocytes were obtained from *Sirt2*<sup>Tg/+</sup> animals compared  
16 to *Sirt2*<sup>+/+</sup> littermates (Fig. 4c, Extended Data Fig. 8). Given the importance of spindle integrity  
17 and chromosome alignment for chromosome segregation, we next tested whether oocytes from  
18 aged *Sirt2*<sup>Tg/+</sup> animals might be less prone to aneuploidy, a pathogenomic feature of poor-  
19 quality oocytes from aged females. Predictably, aneuploidy rates increased with ageing, from  
20 15% at 3 months of age, to 43% at 16 months of age in *Sirt2*<sup>+/+</sup> wild type oocytes, whereas in  
21 oocytes from aged *Sirt2*<sup>Tg/+</sup> littermates the incidence was 20%, comparable to young females  
22 (Fig. 4d).

23

24 Oxidative stress is considered a key driver of oocyte ageing and female infertility (37). SIRT2  
25 deacetylates and maintains the activity of the pentose phosphate pathway enzyme glucose-6-

1 phosphate dehydrogenase (G6PD) (35), which regenerates the antioxidant glutathione through  
2 its production of NADPH. Compared to wild type oocytes, *Sirt2<sup>Tg/+</sup>* oocytes from aged animals  
3 displayed markedly reduced levels of ROS as determined by staining with the ROS-sensitive  
4 fluorescent dye H<sub>2</sub>DCFDA under both young (5-6 month old) unchallenged (Fig. 4e, f) and  
5 H<sub>2</sub>O<sub>2</sub> challenged conditions (Extended Data Fig. 8e, f). Consistent with our hypothesis and  
6 these data, we observed increased G6PD enzyme activity in these oocytes (Fig. 4g).

7  
8 Given the improved characteristics of oocytes from aged *Sirt2<sup>Tg/+</sup>* animals, we next sought to  
9 determine whether this translated into improved fertility. Animals from this strain were aged  
10 to 15 months, well past the normal end of fertility for this strain of around 8 months, and  
11 subjected to timed breeding trials to determine pregnancy rates, as defined by the presence of  
12 a fetal heartbeat. Consistent with very low fertility at this age, only 25% of wild type *Sirt2<sup>+/+</sup>*  
13 females achieved a pregnancy over 5 mating rounds. Notably, in *Sirt2<sup>Tg/+</sup>* females pregnancy  
14 rates tripled to 75% (Fig. 4h). We were unable to ascertain litter size and live birth rates in this  
15 study, due to high rates of rapid parental infanticide observed in these aged animals, however  
16 increased pregnancy rates are indicative of improved fertility during ageing. Taken together,  
17 these data demonstrate that the NAD<sup>+</sup> dependent deacylase SIRT2 is sufficient to maintain  
18 ovarian function and female fertility during ageing.

19  
20 Although these data suggested that SIRT2 was sufficient to recapitulate the benefits of NMN  
21 to fertility, we next sought to determine whether SIRT2 was also obligatory for maintaining  
22 normal oocyte function, through the use of *Sirt2<sup>-/-</sup>* knockout animals. Oocytes from whole body  
23 *Sirt2<sup>-/-</sup>* knockout mice at the age of 5-6 months displayed completely normal spindle assembly  
24 and maturation (Fig. 4i), indicating that at a younger age where NAD is replete, SIRT2 is not  
25 essential for accurate spindle assembly, or that there is redundancy in the role of SIRT2 with

1 other yet to be identified factors. These *in vivo* results from *Sirt2* knockout animals are in  
2 contrast to studies of *in vitro* morpholino knockdown of *Sirt2* (28) or chemical inhibition of  
3 SIRT2 in oocytes (38), where depletion or inhibition results in spindle assembly defects and  
4 aneuploidy (28, 29). The discrepancy between these results may be due to the compensatory,  
5 upregulation of other factors in constitutive knockout animals, versus the acute depletion of  
6 SIRT2 in oocytes during *in vitro* maturation. Together, these data suggest that SIRT2 is  
7 sufficient, but not required to improve oocyte quality during ageing.

8

9

10 *In vitro treatment with NMN enhances embryo development during ageing or in a minimal*  
11 *growth environment*

12 These data show that tissue NAD<sup>+</sup> levels are critical for oocytes and female fertility during  
13 ageing. Next, we asked whether elevating NAD<sup>+</sup> might also benefit pre-implantation embryo  
14 development. If so, *in vitro* treatment with NAD<sup>+</sup> precursors might enhance embryonic  
15 developmental milestones and benefit IVF outcomes for reproductively aged females, enabling  
16 its rapid clinical translation. To test this, IVF was performed using *in vivo* matured oocytes  
17 from reproductively aged (12 month) or young (4 weeks) females. Following IVF, embryos  
18 were cultured in normal, replete embryo culture medium in the presence or absence of NMN.  
19 Consistent with the idea that a deficiency in NAD<sup>+</sup> levels with increasing age drives poor  
20 reproductive outcomes, supplementation of medium with NMN improved blastocyst formation  
21 in embryos derived from oocytes from aged, 12 month old females (Fig. 5a, Extended Data  
22 Fig. 9, 10), but not in embryos arising from oocytes from young, 4-week old females (Extended  
23 Data Fig. 10) which naturally exhibit high developmental competence. To further assess  
24 whether NMN could rescue embryo development under challenged conditions, embryos from  
25 young animals were maintained in simple culture media, which accentuates culture stress and

1 restricts embryo development (39). Consistent with results using oocytes from aged animals,  
2 the addition of NMN to simple media improved blastocyst cell number, an indicator of  
3 implantation success (Fig. 5b).

4  
5 Mammalian cells have the capacity to generate NAD<sup>+</sup> via several biosynthetic routes and  
6 intermediate precursors, including from nicotinamide in the recycling pathway, nicotinic acid  
7 in the Preiss-Handler pathway (40, 41), tryptophan and quinolinic acid in the *de novo* pathway  
8 (42, 43), and nicotinamide riboside in the nicotinamide riboside kinase (NRK) pathway (44).  
9 NMN is an intermediate in the recycling pathway, where the enzyme nicotinamide  
10 phosphoribosyltransferase (NAMPT) generates NMN from nicotinamide, and it is also an  
11 intermediate in the NRK pathway, where the enzyme NRK phosphorylates nicotinamide  
12 riboside (NR) into NMN (44). To assess whether NAD<sup>+</sup> synthesis via endogenous NMN  
13 production in the recycling pathway plays a role in embryo development, we cultured embryos  
14 in the presence of FK866, an inhibitor of the enzyme NAMPT (23). FK866 treatment induced  
15 blastocyst degeneration on day 6 of culture (Fig. 5c), and this could be rescued by NMN co-  
16 treatment (Fig. 5d). Interestingly, the blastocyst degeneration induced by FK866 treatment  
17 could also be partially or completely rescued through treatment with other NAD<sup>+</sup> precursors  
18 including nicotinic acid mononucleotide (NaMN), nicotinic acid riboside (NaR) and  
19 nicotinamide riboside (NR) (Fig. 5d). These data suggest that while NAD<sup>+</sup> production requires  
20 NMN via NAMPT in the recycling pathway in the developing embryo, the NRK and Preiss-  
21 Handler pathways are also present and capable of compensating for this deficiency. In contrast  
22 to the embryo degeneration imposed by NAMPT inhibition, treatment with 2-hydroxynicotinic  
23 acid, an inhibitor of the Preiss Handler pathway enzyme nicotinic acid  
24 phosphoribosyltransferase (NaPRT) (45), did not affect embryo development (Fig. 5e).  
25 Together, these data suggest that the Preiss-Handler pathway is present and capable of

1 compensating for NAMPT inhibition, but is not required for NAD<sup>+</sup> biosynthesis in embryos  
2 under normal circumstances.

3

4 NAD<sup>+</sup> plays a prominent role as a redox cofactor used in fundamental metabolic reactions  
5 required to sustain life. It is also consumed as a substrate by several enzymes which have been  
6 described to play a role in biological ageing, most notably the sirtuins, which are thought to be  
7 critically dependent on NAD<sup>+</sup> availability. To determine the contribution of this class of  
8 enzymes to embryo development and the effects of NMN, we next grew embryos in the  
9 presence of the small molecule sirtuin inhibitors sirtinol (46) and splitomicin (47) under simple  
10 defined growth media conditions which can induce culture stress (39). Both inhibitors reduced  
11 both blastocyst formation and cell numbers (Fig. 6a-b, Extended Data Fig. 12). We next sought  
12 to determine whether the effects of NMN were dependent on the activity of the sirtuins through  
13 co-treating embryos under simple defined media growth conditions (39) with NMN and sirtinol  
14 (Fig. 6c). The decline in embryo cell number induced by sirtinol treatment was partially  
15 reversed by NMN co-treatment (Fig. 6c), suggesting that the ability of NMN to enhance cell  
16 number and developmental milestones was not solely dependent upon the targets of this  
17 inhibitor. While these data suggest that the activity of the sirtuins are essential to embryo  
18 development, they do not suggest that they are the primary target of NMN in enhancing post-  
19 fertilisation embryogenesis.

20

21 Given the ability of sirtuin inhibitors to reduce blastocyst quality, we next sought to determine  
22 the pathway through which inhibition of sirtuins would restrict embryo growth. The most  
23 prominently studied member of the sirtuins is SIRT1, which has deacetylase activity towards  
24 p53 to inhibit its activity and prevent apoptosis (48, 49). p53 activity is increased in embryos  
25 produced by IVF compared to *in vivo* derived embryos, likely due to culture stress, and its

1 heterozygous or homozygous genetic deletion overcomes the effects of culture stress on  
2 blastocyst development (39, 50). Activation of p53 is detrimental as it specifically inhibits  
3 proliferation and induces apoptosis of the inner cell mass, which goes on to form the developing  
4 fetus (51-53). Here, we observed that treatment with the p53 inhibitor pifithrin (54) overcame  
5 sirtinol-mediated reduction in blastocyst development (Fig. 6d) and cell number (Fig. 6e),  
6 suggesting that p53 dependent hypotrophy is sirtuin mediated, a result that is consistent with  
7 previous findings on the mechanism of apoptosis in other cell types by sirtinol (55).

8

9

## 10 **Discussion**

11 There is an ongoing trend across the developed world to defer pregnancy until later in life.  
12 Combined with the steady decrease in female fertility beyond the middle of the third decade of  
13 life, this has led to falling fertility rates and a steady increase in demand for assisted  
14 reproduction technologies. Despite maternal age being the greatest clinical challenge for  
15 reproductive medicine, the mechanisms through which oocyte quality decline as women age  
16 remain largely unclear and there are no therapeutic treatments. In the current study, we provide  
17 evidence for NAD<sup>+</sup> availability as an important determinant of fertility in aged females. We  
18 show that levels of NAD<sup>+</sup> rapidly decline in the ovary with age, and our data demonstrate that  
19 NAD<sup>+</sup> repletion using the NAD<sup>+</sup> precursor NMN in mice enhances ovulation rate, reduces  
20 oocyte spindle defects, improves oocyte developmental competence *in vivo* and embryo  
21 development during IVF, culminating in improved fertility.

22

23 The present study is also the first to implicate the NAD<sup>+</sup> pathway in regulating ovulation rate,  
24 which applies to a poly-ovulatory species such as the mouse. While we measured NAD<sup>+</sup> levels  
25 in the ovary in this study, we do not exclude the possibility that NMN exerts benefits especially

1 to folliculogenesis through direct interactions with tissues other than the ovary, as we delivered  
2 NMN through systemic dosing. NMN may exert primary effects directly in the ovary, or it may  
3 instead be possible that systemic improvements in vascular function (56), metabolic  
4 homeostasis (13, 16), mitochondrial function (10) and stem cell function (57) or signalling in  
5 the brain could lead to secondary improvements in ovarian function. These findings should  
6 especially be viewed in light of the well-studied role of NAD<sup>+</sup> raising molecules in maintaining  
7 late-life health (14) and the biology of ageing. Regardless, these results provide support for the  
8 premise that age-related reductions in NAD<sup>+</sup> availability contribute to female infertility, and  
9 that improved oocyte integrity and/or oocyte yield following superovulation following  
10 pharmacological restoration of NAD<sup>+</sup> through the administration of metabolic precursors opens  
11 a therapeutic window for the treatment of age-related infertility, and improving the clinical  
12 success rates of IVF.

13

14 While NAD<sup>+</sup> is a prominent molecule used as a cofactor or substrate across a range of reactions,  
15 we sought to address the hypothesis that the benefits of treating with NMN to oocyte integrity  
16 might in part be mediated by the NAD<sup>+</sup> dependent deacylase SIRT2. The benefits of *in vivo*  
17 NMN treatment could largely be recapitulated by transgenic overexpression of *Sirt2* in aged  
18 animals, although its constitutive deletion had no adverse impact on oocyte integrity, at least  
19 in the younger animals studied here. SIRT2 plays a role in the maintenance of microtubule-  
20 kinetochore attachments through its deacylation and stabilisation of BubR1 (26, 29), a process  
21 that ensures fidelity in chromosome separation through ensuring the bipolar orientation of  
22 chromosomes to the spindle. Consequently, in oocytes from *Sirt2*<sup>Tg/+</sup> overexpressing animals,  
23 increases in kinetochore – microtubule stability likely contributed to augmented chromosome  
24 alignment and improved fertility. These observations are corroborated by separate *in vitro*  
25 studies where morpholino-mediated *Sirt2* knockdown or chemical inhibition of SIRT2 in



1 oocytes resulted in severe spindle defects and chromosome disorganization (29, 38). These  
2 results are supported by the apparent lower rates of aneuploidy in oocytes from aged *Sirt2*<sup>Tg/+</sup>  
3 animals in the present study. Surprisingly and in contrast to studies of *in vitro* knockdown of  
4 *Sirt2* following morpholino microinjection into oocytes, we observed that oocytes from  
5 constitutive *Sirt2* knockout mice maintained normal spindle assembly and chromosome  
6 organisation, suggesting the existence of overlapping mechanisms for this process that may  
7 compensate during development, and that SIRT2 is sufficient but not necessary for spindle  
8 assembly, at least at a younger age where NAD<sup>+</sup> is replete.

9  
10 Having demonstrated that *in vivo* NMN treatment increased ovulation rate, improved oocyte  
11 quality and overall litter size, we assessed the effect of supplementing embryo culture media  
12 with NMN. The present study established that culturing embryos from aged female mice in the  
13 presence of NMN improved blastocyst formation. Similarly, NMN increased blastocyst cell  
14 number in embryos from old animals cultured in replete embryo medium and in embryos from  
15 young animals grown in nutritionally suboptimal medium (39). Importantly, NMN did not  
16 confer any benefit to embryos from young animals maintained under standard embryo culture  
17 conditions, supporting the idea that this intervention addresses an age-related deficit in NAD<sup>+</sup>  
18 levels. These findings are highly relevant to the clinical practice of IVF. In addition to age-  
19 related issues of decreased oocyte numbers and oocyte integrity; mitotic aneuploidy (58) and  
20 poor preimplantation embryo development (59) limits the number of euploid blastocysts  
21 available for transfer. Increased mtDNA copy number (60) and reduced gene expression  
22 regulating cell cycle control (61) relative to younger patients have been implicated in reduced  
23 viability in embryos derived from females of advanced maternal age. This manifests in  
24 reproductively aged females having notably fewer viable euploid blastocysts for transfer,  
25 culminating in IVF live birth rates falling from 19.2% in women under 30, 12.4% in 35-39,

1 and 4.6% in women 40-44 years of age (62). These Australian and New Zealand data  
2 underscore the significant clinical demand for a therapeutic that can assist in improving  
3 pregnancy success rates in reproductively aged women.

4  
5 In this work we also interrogated the contributions of the different NAD<sup>+</sup> biosynthetic pathways  
6 present in mammals to embryo health. Our experiments focused on NMN, an intermediate in  
7 the NAD<sup>+</sup> recycling pathway produced by the enzyme NAMPT, and also the product of the  
8 NRK enzymes, which feed into the same pathway. Running separately to the recycling or  
9 NAD<sup>+</sup> pathways, the Priess-Handler pathway and *de novo* pathway both utilise the intermediate  
10 NaMN via the enzymes NaPRT and QPRT, respectively. We found that blastocysts underwent  
11 degeneration when exposed to the NAMPT inhibitor FK866 (23), but not the NaPRT inhibitor  
12 2-hydroxynicotinic acid (45). NMN co-treatment overcame the block on NAMPT by FK866,  
13 however the intermediates NR, NaR and NaMN also overcame the effects of FK866. This  
14 suggests that the NRK pathway, which utilises NR and NaR (44, 63), and the Priess-Handler  
15 and *de novo* pathways which utilise NaMN (40, 41) are present in the developing embryo, but  
16 their activity is not essential to normal embryo growth. The results also shed light on the  
17 opportunity to enhance oocyte and embryo health using multiple NAD<sup>+</sup> boosting compounds.

18  
19 NAD<sup>+</sup> raising compounds are frequently studied in terms of their ability to improve the activity  
20 of the NAD<sup>+</sup> dependent sirtuin class of enzymes. We found that two structurally unrelated  
21 small molecule inhibitors of the sirtuins drastically reduced embryo development. Given that  
22 sirtuin expression decreases as embryo development progresses (53) and NMN co-treatment  
23 could partially reverse this block suggests that the effects of NMN may be mediated only in  
24 part through this class of enzymes. It is likely that increasing NAD<sup>+</sup> through NMN treatment  
25 enhances embryo development through many processes, including maintaining redox

1 homeostasis, electron transport and oxidative phosphorylation in the mitochondria, nutrient  
2 catabolism, facilitation of DNA repair, and as we show here, maintaining activity of the  
3 sirtuins. We showed that reductions in embryo development during sirtinol treatment were  
4 mediated through p53, which blocks blastocyst development (53) and formation of the inner  
5 cell mass (51, 52), particularly during suboptimal culture conditions (50). This mechanism  
6 likely reflects the role of SIRT1 as a deacetylase for p53, maintaining it in an inactive state and  
7 preventing apoptosis (48).

8

9 Together, this work represents a clinically tractable pharmacological intervention to non-  
10 invasively treat female infertility caused by a loss of oocyte viability or depletion of ovulation  
11 yield in reproductively aged females. These findings have immediate implications for the  
12 clinical treatment of infertility. We envisage that this work could lead to the development of  
13 an orally delivered therapeutic that improves oocyte quality for improving natural conception  
14 or the success of IVF. This would present an opportunity to transcend the need for, or enhance  
15 the success of fertility treatments including IVF. In addition, this work could also enhance the  
16 success rates of existing IVF protocols, through improving embryo culture conditions to grow  
17 embryos to a later stage of development. Providing an intervention at this critical step of IVF  
18 would make a clinically relevant difference to IVF success rates in the high proportion of IVF  
19 patients who are reproductively aged. Any intervention that would improve the success rates  
20 of IVF would also lead to cost savings and lower the emotional stress of failed IVF rounds or  
21 subsequent miscarriage which can lead to long term psychological and social issues including  
22 depression and relationship breakdown. This would represent the first intervention for enabling  
23 women with poor oocyte quality to have children with their own genetic make-up as currently,  
24 these women have no alternative but to use donated oocytes. Future studies should aim to test

1 NAD<sup>+</sup> raising compounds in a clinical setting, both as an oral therapeutic, and as an additive  
2 to embryo media during IVF, to test the relevance of these findings to human infertility.

3

4

## 5 **Methods**

6 Data in this manuscript are presented using modified versions of Gardner-Altman and  
7 Cumming estimation plots obtained using the recently developed DABEST data analysis  
8 package (64). Raw data points are shown on the left; the mean difference from control is plotted  
9 on a separate axis on the right as a bias corrected and accelerated bootstrap sampling  
10 distribution (65), where 5,000 bootstrap samples are taken, and the confidence interval is bias-  
11 corrected. Mean differences are depicted as a dot; the 95% confidence interval is indicated by  
12 the ends of the vertical error bar. Traditional null-hypothesis statistics testing based analyses  
13 for each figure are provided in Extended Data.

14

15 Detailed methods are available in Supplementary Methods. Further detail on statistical analyses  
16 are available in Extended Data Table 1 with all calculations available in Supplementary  
17 Information (.xml files).

18

19

20

21

22

23

24

25

26

## 1 References

2

- 3 1. Sauer MV (2015) Reproduction at an advanced maternal age and maternal health. *Fertil*  
4 *Steril* 103(5):1136-1143.
- 5 2. Adamson GD, *et al.* (2018) International Committee for Monitoring Assisted Reproductive  
6 Technology: world report on assisted reproductive technology, 2011. *Fertil Steril*  
7 110(6):1067-1080.
- 8 3. De Vos M, Smits J, & Woodruff TK (2014) Fertility preservation in women with cancer. *Lancet*  
9 384(9950):1302-1310.
- 10 4. Kumar P, Sait SF, Sharma A, & Kumar M (2011) Ovarian hyperstimulation syndrome. *J Hum*  
11 *Reprod Sci* 4(2):70-75.
- 12 5. Kjaer T, *et al.* (2014) Divorce or end of cohabitation among Danish women evaluated for  
13 fertility problems. *Acta Obstet Gynecol Scand* 93(3):269-276.
- 14 6. Greaney J, Wei Z, & Homer H (2017) Regulation of chromosome segregation in oocytes and  
15 the cellular basis for female meiotic errors. *Hum Reprod Update*.
- 16 7. Franasiak JM, *et al.* (2014) The nature of aneuploidy with increasing age of the female  
17 partner: a review of 15,169 consecutive trophoctoderm biopsies evaluated with  
18 comprehensive chromosomal screening. *Fertil Steril* 101(3):656-663 e651.
- 19 8. Snijders RJ, Sundberg K, Holzgreve W, Henry G, & Nicolaides KH (1999) Maternal age- and  
20 gestation-specific risk for trisomy 21. *Ultrasound Obstet Gynecol* 13(3):167-170.
- 21 9. Vijg J & Suh Y (2013) Genome instability and aging. *Annu Rev Physiol* 75:645-668.
- 22 10. Gomes AP, *et al.* (2013) Declining NAD(+) induces a pseudohypoxic state disrupting nuclear-  
23 mitochondrial communication during aging. *Cell* 155(7):1624-1638.
- 24 11. Baker DJ, *et al.* (2004) BubR1 insufficiency causes early onset of aging-associated  
25 phenotypes and infertility in mice. *Nat Genet* 36(7):744-749.
- 26 12. Massudi H, *et al.* (2012) Age-associated changes in oxidative stress and NAD+ metabolism in  
27 human tissue. *PLoS One* 7(7):e42357.
- 28 13. Mills KF, *et al.* (2016) Long-Term Administration of Nicotinamide Mononucleotide Mitigates  
29 Age-Associated Physiological Decline in Mice. *Cell Metab* 24(6):795-806.
- 30 14. Rajman L, Chwalek K, & Sinclair DA (2018) Therapeutic Potential of NAD-Boosting Molecules:  
31 The In Vivo Evidence. *Cell Metab* 27(3):529-547.
- 32 15. Clement J, Wong M, Poljak A, Sachdev P, & Braidy N (2018) The Plasma NAD(+) Metabolome  
33 Is Dysregulated in "Normal" Aging. *Rejuvenation Res*.
- 34 16. Yoshino J, Mills KF, Yoon MJ, & Imai S (2011) Nicotinamide mononucleotide, a key NAD(+)  
35 intermediate, treats the pathophysiology of diet- and age-induced diabetes in mice. *Cell*  
36 *Metab* 14(4):528-536.
- 37 17. Kolenc OI & Quinn KP (2019) Evaluating Cell Metabolism Through Autofluorescence Imaging  
38 of NAD(P)H and FAD. *Antioxid. Redox Signal.* 30(6):875-889.
- 39 18. Dong Y, Digman MA, & Brewer GJ (2019) Age- and AD-related redox state of NADH in  
40 subcellular compartments by fluorescence lifetime imaging microscopy. *Geroscience*  
41 41(1):51-67.
- 42 19. Rittenberg V, *et al.* (2011) Effect of body mass index on IVF treatment outcome: an updated  
43 systematic review and meta-analysis. *Reprod Biomed Online* 23(4):421-439.
- 44 20. Yahata N, Yuasa S, & Araki T (2009) Nicotinamide mononucleotide adenylyltransferase  
45 expression in mitochondrial matrix delays Wallerian degeneration. *J Neurosci* 29(19):6276-  
46 6284.

- 1 21. Berger F, Lau C, Dahlmann M, & Ziegler M (2005) Subcellular compartmentation and  
2 differential catalytic properties of the three human nicotinamide mononucleotide  
3 adenylyltransferase isoforms. *J Biol Chem* 280(43):36334-36341.
- 4 22. Wu X, *et al.* (2019) NMNAT2-mediated NAD(+) generation is essential for quality control of  
5 aged oocytes. *Aging Cell*:e12955.
- 6 23. Hasmann M & Schemainda I (2003) FK866, a highly specific noncompetitive inhibitor of  
7 nicotinamide phosphoribosyltransferase, represents a novel mechanism for induction of  
8 tumor cell apoptosis. *Cancer Res* 63(21):7436-7442.
- 9 24. Lane M & Gardner DK (1997) Differential regulation of mouse embryo development and  
10 viability by amino acids. *J Reprod Fertil* 109(1):153-164.
- 11 25. North BJ, Marshall BL, Borra MT, Denu JM, & Verdin E (2003) The human Sir2 ortholog,  
12 SIRT2, is an NAD<sup>+</sup>-dependent tubulin deacetylase. *Mol Cell* 11(2):437-444.
- 13 26. North BJ, *et al.* (2014) SIRT2 induces the checkpoint kinase BubR1 to increase lifespan.  
14 *EMBO J* 33(13):1438-1453.
- 15 27. Homer H, Gui L, & Carroll J (2009) A spindle assembly checkpoint protein functions in  
16 prophase I arrest and prometaphase progression. *Science* 326(5955):991-994.
- 17 28. Zhang L, *et al.* (2014) Sirt2 functions in spindle organization and chromosome alignment in  
18 mouse oocyte meiosis. *FASEB J* 28(3):1435-1445.
- 19 29. Qiu D, *et al.* (2017) Sirt2-BubR1 acetylation pathway mediates the effects of advanced  
20 maternal age on oocyte quality. *Aging Cell*.
- 21 30. Touati SA, *et al.* (2015) Mouse oocytes depend on BubR1 for proper chromosome  
22 segregation but not for prophase I arrest. *Nat Commun* 6:6946.
- 23 31. Riris S, Webster P, & Homer H (2014) Digital multiplexed mRNA analysis of functionally  
24 important genes in single human oocytes and correlation of changes in transcript levels with  
25 oocyte protein expression. *Fertil Steril* 101(3):857-864.
- 26 32. Kim HS, *et al.* (2011) SIRT2 maintains genome integrity and suppresses tumorigenesis  
27 through regulating APC/C activity. *Cancer Cell* 20(4):487-499.
- 28 33. Jin F, *et al.* (2010) Cdc20 is critical for meiosis I and fertility of female mice. *PLoS Genet*  
29 6(9):e1001147.
- 30 34. Homer H (2013) The APC/C in female mammalian meiosis I. *Reproduction* 146(2):R61-71.
- 31 35. Wang YP, *et al.* (2014) Regulation of G6PD acetylation by SIRT2 and KAT9 modulates NADPH  
32 homeostasis and cell survival during oxidative stress. *The EMBO journal* 33(12):1304-1320.
- 33 36. Luberda Z (2005) The role of glutathione in mammalian gametes. *Reprod Biol* 5(1):5-17.
- 34 37. Agarwal A, Aponte-Mellado A, Premkumar BJ, Shaman A, & Gupta S (2012) The effects of  
35 oxidative stress on female reproduction: a review. *Reprod Biol Endocrinol* 10:49.
- 36 38. Riepsamen A, *et al.* (2015) Nicotinamide impairs entry into and exit from meiosis I in mouse  
37 oocytes. *PLoS One* 10(5):e0126194.
- 38 39. Li A, Ganeshan L, & O'Neill C (2012) The effect of Trp53 gene-dosage and parent-of-origin of  
39 inheritance on mouse gamete and embryo function in vitro. *Biol Reprod* 86(6):175.
- 40 40. Preiss J & Handler P (1958) Biosynthesis of diphosphopyridine nucleotide. II. Enzymatic  
41 aspects. *J Biol Chem* 233(2):493-500.
- 42 41. Preiss J & Handler P (1958) Biosynthesis of diphosphopyridine nucleotide. I. Identification of  
43 intermediates. *J Biol Chem* 233(2):488-492.
- 44 42. Okuno E & Schwarcz R (1985) Purification of quinolinic acid phosphoribosyltransferase from  
45 rat liver and brain. *Biochim Biophys Acta* 841(1):112-119.
- 46 43. Nishizuka Y & Hayaishi O (1963) Studies on the Biosynthesis of Nicotinamide Adenine  
47 Dinucleotide. I. Enzymic Synthesis of Niacin Ribonucleotides from 3-Hydroxyanthranilic Acid  
48 in Mammalian Tissues. *J Biol Chem* 238:3369-3377.
- 49 44. Bieganowski P & Brenner C (2004) Discoveries of nicotinamide riboside as a nutrient and  
50 conserved NRK genes establish a Preiss-Handler independent route to NAD<sup>+</sup> in fungi and  
51 humans. *Cell* 117(4):495-502.

- 1 45. Piacente F, *et al.* (2017) Nicotinic Acid Phosphoribosyltransferase Regulates Cancer Cell  
2 Metabolism, Susceptibility to NAMPT Inhibitors, and DNA Repair. *Cancer Res* 77(14):3857-  
3 3869.
- 4 46. Grozinger CM, Chao ED, Blackwell HE, Moazed D, & Schreiber SL (2001) Identification of a  
5 class of small molecule inhibitors of the sirtuin family of NAD-dependent deacetylases by  
6 phenotypic screening. *J Biol Chem* 276(42):38837-38843.
- 7 47. Bedalov A, Gatabonton T, Irvine WP, Gottschling DE, & Simon JA (2001) Identification of a  
8 small molecule inhibitor of Sir2p. *Proc Natl Acad Sci U S A* 98(26):15113-15118.
- 9 48. Vaziri H, *et al.* (2001) hSIR2(SIRT1) functions as an NAD-dependent p53 deacetylase. *Cell*  
10 107(2):149-159.
- 11 49. Cheng HL, *et al.* (2003) Developmental defects and p53 hyperacetylation in Sir2 homolog  
12 (SIRT1)-deficient mice. *Proc Natl Acad Sci U S A* 100(19):10794-10799.
- 13 50. Li A, Chandrakanthan V, Chami O, & O'Neill C (2007) Culture of zygotes increases TRP53  
14 [corrected] expression in B6 mouse embryos, which reduces embryo viability. *Biol Reprod*  
15 76(3):362-367.
- 16 51. Ganeshan L, Jin XL, & O'Neill C (2017) The induction of tumour suppressor protein P53 limits  
17 the entry of cells into the pluripotent inner cell mass lineage in the mouse embryo. *Exp Cell*  
18 *Res* 358(2):227-233.
- 19 52. Ganeshan L, Li A, & O'Neill C (2010) Transformation-related protein 53 expression in the  
20 early mouse embryo compromises preimplantation embryonic development by preventing  
21 the formation of a proliferating inner cell mass. *Biol Reprod* 83(6):958-964.
- 22 53. Kawamura Y, *et al.* (2010) Sirt3 protects in vitro-fertilized mouse preimplantation embryos  
23 against oxidative stress-induced p53-mediated developmental arrest. *J Clin Invest*  
24 120(8):2817-2828.
- 25 54. Komarov PG, *et al.* (1999) A chemical inhibitor of p53 that protects mice from the side  
26 effects of cancer therapy. *Science* 285(5434):1733-1737.
- 27 55. Peck B, *et al.* (2010) SIRT inhibitors induce cell death and p53 acetylation through targeting  
28 both SIRT1 and SIRT2. *Mol Cancer Ther* 9(4):844-855.
- 29 56. Das A, *et al.* (2018) Impairment of an Endothelial NAD(+)-H2S Signaling Network Is a  
30 Reversible Cause of Vascular Aging. *Cell* 173(1):74-89 e20.
- 31 57. Zhang H, *et al.* (2016) NAD<sup>+</sup> repletion improves mitochondrial and stem cell function and  
32 enhances life span in mice. *Science*.
- 33 58. Munne S, Sandalinas M, Escudero T, Marquez C, & Cohen J (2002) Chromosome mosaicism  
34 in cleavage-stage human embryos: evidence of a maternal age effect. *Reprod Biomed Online*  
35 4(3):223-232.
- 36 59. Janny L & Menezo YJ (1996) Maternal age effect on early human embryonic development  
37 and blastocyst formation. *Mol Reprod Dev* 45(1):31-37.
- 38 60. Fragouli E, *et al.* (2015) Altered levels of mitochondrial DNA are associated with female age,  
39 aneuploidy, and provide an independent measure of embryonic implantation potential. *PLoS*  
40 *Genet* 11(6):e1005241.
- 41 61. Kawai K, *et al.* (2018) Parental age and gene expression profiles in individual human  
42 blastocysts. *Sci Rep* 8(1):2380.
- 43 62. NPESU (2016) Assisted reproductive technology in Australia and New Zealand 2016. (UNSW  
44 Sydney, Fertility Society of Australia).
- 45 63. Tempel W, *et al.* (2007) Nicotinamide riboside kinase structures reveal new pathways to  
46 NAD<sup>+</sup>. *PLoS Biol* 5(10):e263.
- 47 64. Ho J, Tumkaya T, Aryal S, Choi H, & Claridge-Chang A (2019) Moving beyond P values: data  
48 analysis with estimation graphics. *Nat Methods*.
- 49 65. Efron B (1984) Better Bootstrap Confidence Intervals. *Journal of the American Statistical*  
50 *Association* 82(397):171-185.

51

## 1 **Supplementary Information**

2

3 Supplementary Information 1 provides detailed methods for all experiments, including  
4 statistical design. Detailed statistical analysis calculations are provided as Supplementary  
5 Information (Data Analysis). Summarised statistics for all figures are also available in  
6 Extended Data Table 1.

7

8

## 9 **Funding and acknowledgments**

10

11 This work was supported by the National Health and Medical Research Council (NHMRC) of  
12 Australia, through grants APP1103689 and APP1122484 to LEW, DAS and HAH,  
13 APP1139763 to RBG, LEW and KAW, APP1044295 to MJM and DAS, APP1066172 to NT,  
14 DGLC and DAS, and a Career Development Fellowship to LEW (APP1127821). It was also  
15 supported by the Australian Research Council (ARC) grants DP170101863 and CE140100003  
16 to EMG. The salary and experimental costs of MB and DMG working in the lab of RBG and  
17 LEW was partly supported by Jumpstart Fertility. KS is an employee of Jumpstart Fertility.  
18 We gratefully acknowledge assistance from the UNSW Biological Resource Centre. We also  
19 wish to thank the Solina Chau foundation and Mr Hejun (Steven) Zhang for their philanthropic  
20 support.

21

## 22 **Author contributions**

23 LEW, HAH and DAS conceived of this study and obtained funding. LEW, HAH, DAS, RBG,  
24 KAW, CO, MJM and EG designed and supervised experiments, and analysed and interpreted  
25 results. WHJH, DRL, MJB, DG, AR, KS, JB, WGNL, ASAW, DR, CL, JM, NY, LL, RMW,



1 LEQ, SC, LJK, SB, XJL, SM, JMC, AH carried out experiments and analysed results. TA  
2 generated *Nmnat3* transgenic mice. ASM assisted in statistical analysis. NT, DGLC, provided  
3 critical feedback. LEW wrote and prepared this manuscript.

4

5

## 6 **Author information and disclosures**

7 LEW, HAH and DAS are co-founders, shareholders, directors and advisors of Jumpstart  
8 Fertility Inc, which was founded to develop the work described here. The salaries of MJB and  
9 DG were paid by contract research from Jumpstart Fertility to UNSW. KS is an employee of  
10 Jumpsstart Fertility. WHJH and DRL are shareholders of Jumpstart Fertility. LEW and DAS  
11 are also advisors and shareholders in EdenRoc Sciences (Metro Biotech NSW, Metro Biotech,  
12 Liberty Biosecurity), and in Life Biosciences LLC and its daughter companies (Jumpstart  
13 Fertility, Continuum Biosciences, Senolytic Therapeutics, Selphagy, Animal Biosciences).  
14 LEW is an advisor and shareholder in Intravital Pty Ltd. DAS is also a founder, equity owner,  
15 advisor, director, consultant, investor and/or inventor on patents licensed to Vium, Jupiter  
16 Orphan Therapeutics, Cohbar, Galilei Biosciences, Wellomics, EdenRoc Sciences (and  
17 affiliates Arc-Bio, Dovetail Genomics, Claret, Revere Biosciences, UpRNA, MetroBiotech,  
18 Liberty Biosecurity, Life Biosciences (and affiliates Selphagy, Senolytic Therapeutics,  
19 Spotlight Therapeutics, Animal Biosciences, Iduna, Continuum, Jumpstart Fertility). He is an  
20 inventor on a patent application filed by Mayo Clinic and Harvard Medical School that has  
21 been licensed to Elysium Health. For details see <https://genetics.med.harvard.edu/sinclair/>

22

23 Correspondence should be addressed to:

24 Lindsay Wu, [lindsay.wu@unsw.edu.au](mailto:lindsay.wu@unsw.edu.au) +61 2 9385 1621

25 Hayden Homer, [h.homer@uq.edu.au](mailto:h.homer@uq.edu.au)

1 David Sinclair, [David\\_sinclair@hms.harvard.edu](mailto:David_sinclair@hms.harvard.edu)

2 **Figure 1**

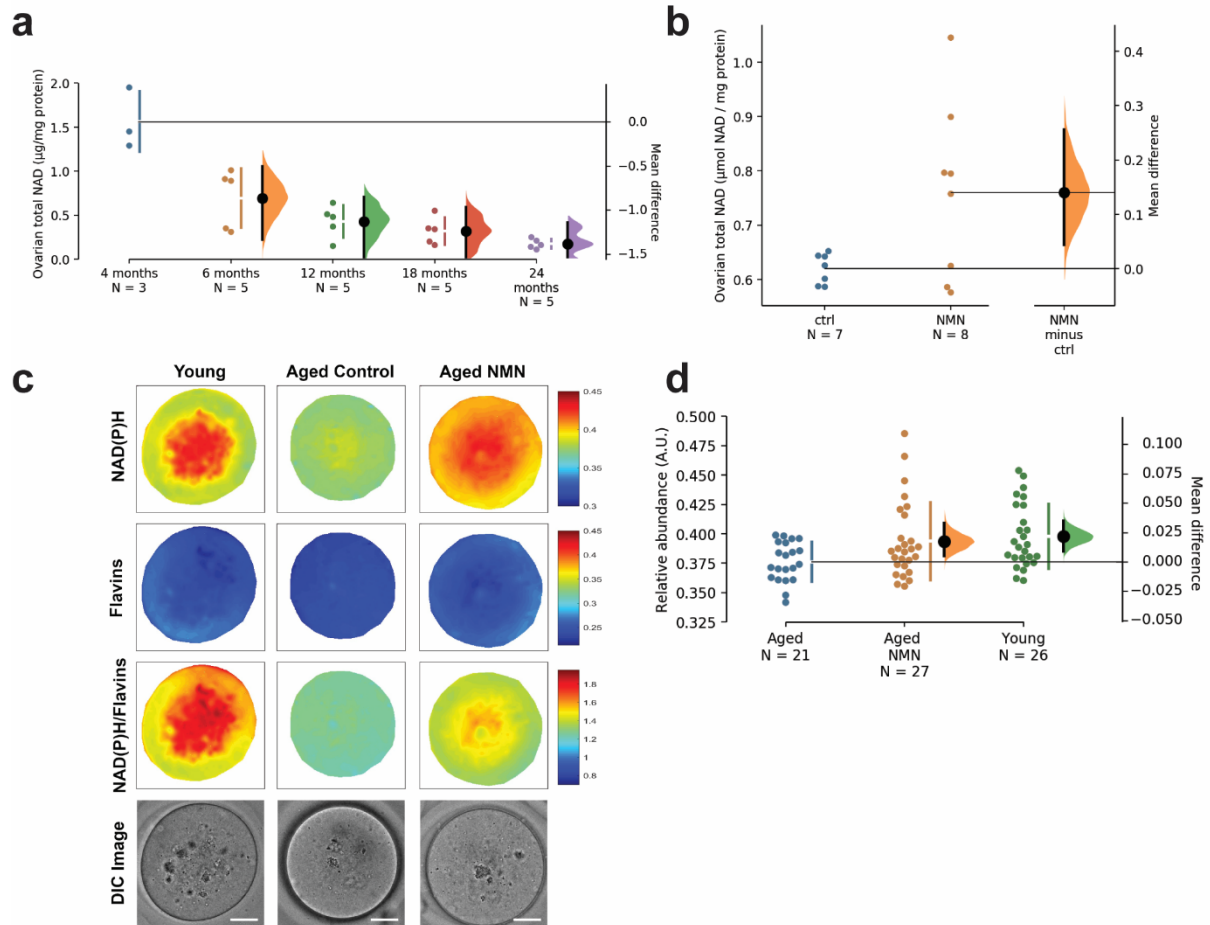

3

4 **Figure 1. Ovarian and oocyte nicotinamide adenine dinucleotide (NAD<sup>+</sup>) declines with**  
5 **age and can be boosted by oral administration with nicotinamide mononucleotide (NMN).**

6 **a**, Ovarian levels of NAD<sup>+</sup> in the mouse declines with age, which **(b)** can be partially restored

7 in 10 month-old mice following acute treatment (500 mg/kg, 2 hr, oral gavage) with NMN. **c**

8 Multispectral imaging was used to exploit the endogenous fluorescence properties of NADH

9 and NADPH to determine NAD(P)H content in oocytes from young (4-5 weeks old) or aged

10 (12 month old) animals treated with or without NMN through addition to drinking water (2

11 g/L) for four weeks (scale bar is 20 microns), quantified in **d**. Data throughout this manuscript

12 are presented as modified Cumming **(a, d)** and Gardner-Altman **(b)** plots. Raw data points are

13 shown on the left; the mean difference from control is plotted on a separate axis on the right as

1 a bias corrected and accelerated bootstrap sampling distribution, where 5,000 bootstrap  
2 samples are taken, and the confidence interval is bias-corrected. Mean differences are depicted  
3 as a dot; the 95% confidence interval is indicated by the ends of the vertical error bar. Data are  
4 also presented using traditional null-hypothesis statistics testing in Extended Data.

5

6

7

8

9

10

11

12

13

14

15

16

17

18

19

20

21

22

23

24

25

1

2 **Figure 2**

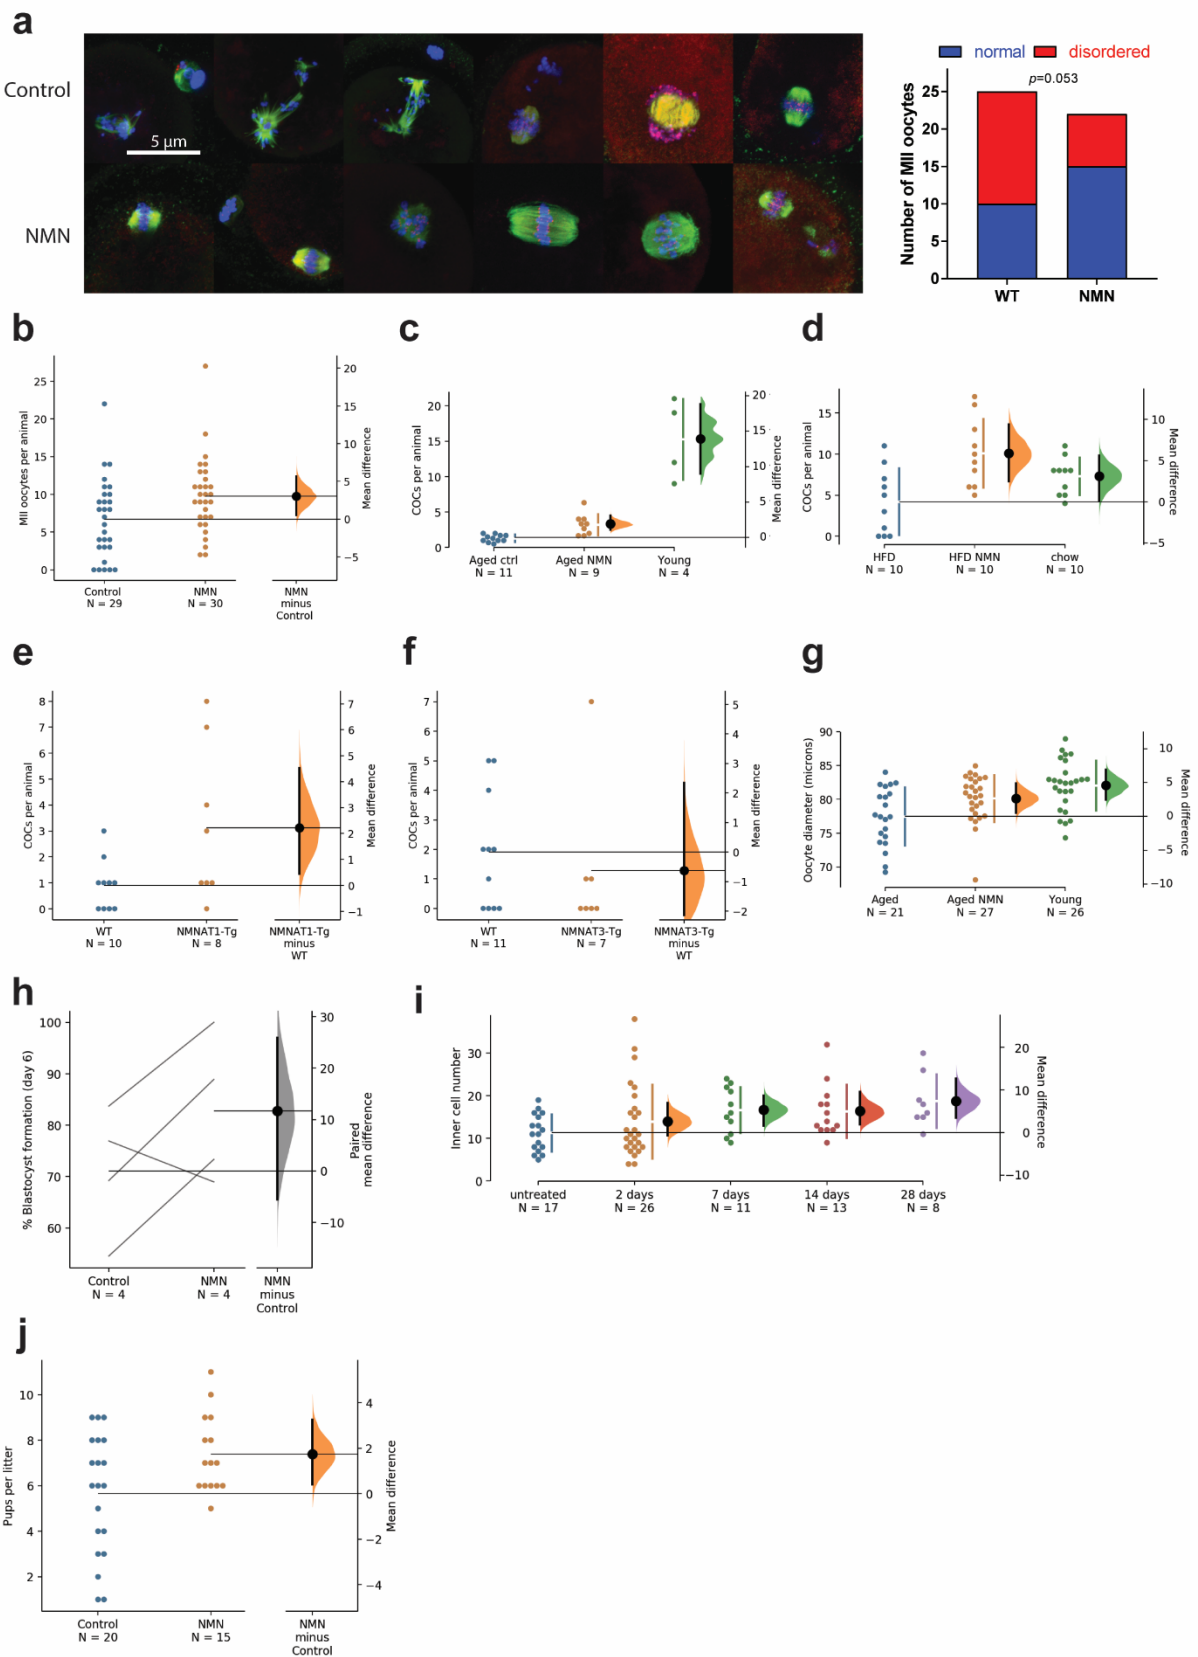

1 **Figure 2. NMN treatments restores oocyte integrity, follicle dynamics, embryo**  
2 **development and pregnancy outcomes. a**, Chronic treatment (drinking water, 2 g/L, 4 weeks)  
3 with NMN from the age of 14 months restores spindle assembly in immunostained oocytes ( $\beta$ -  
4 tubulin in green, Hoescht for DNA in blue, kinetochores (ACA) in red,  $p=0.0503$  by  $\chi^2$  test).  
5 Treatment with NMN improves MII oocyte yield following PMSG and hCG stimulation in (b)  
6 aged C57BL6 mice, and GV stage oocyte yield in (c) 14-16 month old Swiss albino mice, and  
7 (d) high fat diet (HFD) fed Swiss albino mice after 5-6 months of feeding. e, Aged (12-14  
8 month) transgenic mice over-expressing the nuclear  $NAD^+$  biosynthetic enzyme NMNAT1  
9 have increased oocyte yield, in comparison to (f) aged (12-14 month) transgenics  
10 overexpressing the mitochondrial  $NAD^+$  biosynthetic enzyme NMNAT3. g. Following 4 weeks  
11 of NMN treatment (2 g/L, drinking water) in aged (12-month old) or young (4-6 week old)  
12 C57BL6 females, MII oocytes were collected following PMSG and hCG stimulation and  
13 oocyte diameter assessed. In a separate cohort, h these mature oocytes were used for IVF, with  
14 comparisons of percentage blastocyst formation at day 6 of embryo development shown as a  
15 slopegraph with each line representing a separate experimental cohort. i. 12 month-old C57BL6  
16 females were treated for the indicated times with NMN in drinking water (2 g/L), and MII  
17 oocytes collected following PMSG and hCG stimulation and subjected to IVF. At day 6,  
18 embryos were fixed and differentially stained to assess inner cell mass. j. C57BL6 females  
19 (n=10 per group) were treated with NMN (drinking water, 2 g/L) from the age of 10 weeks,  
20 and then subjected to timed breeding at the age of 18 weeks, for 5 rounds with 7-8 weeks  
21 between rounds until the age of 50 weeks, and the number of pups born per litter recorded.

22

23

24

25

1

2

3 **Figure 3**

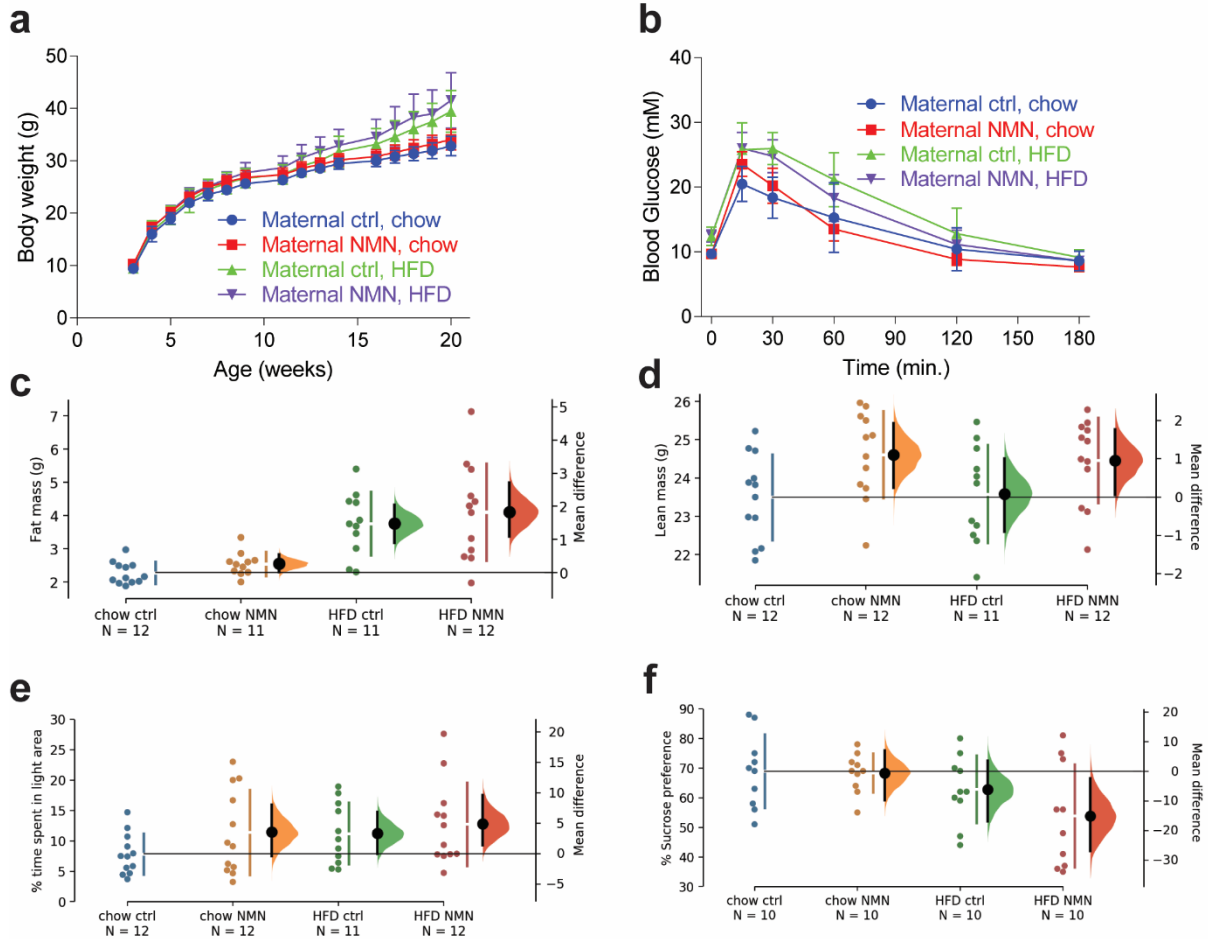

4

5 **Figure 3. Maternal NMN treatment does not impact growth, metabolism or behaviour in**

6 **offspring.** Male offspring from females treated with or without NMN were maintained on

7 standard chow or high fat diets (HFD). **a**, Body weight was measured on an ongoing basis. **b**,

8 Metabolic homeostasis was measured by glucose tolerance test. **c**, Fat mass and **(d)** lean body

9 mass were assessed by quantitative MRI, with a difference in fat mass from HFD but no effect

10 of maternal NMN treatment, and a small but significant increase in lean body mass with

11 maternal NMN treatment. Behaviour was assessed by the **(e)** light/dark box test for anxiety-

12 like behaviour, and the **(f)** sucrose preference test for depression-like behaviour. Data are also

13 presented using traditional null-hypothesis statistics testing in Extended Data.

1

2

3 **Figure 4**

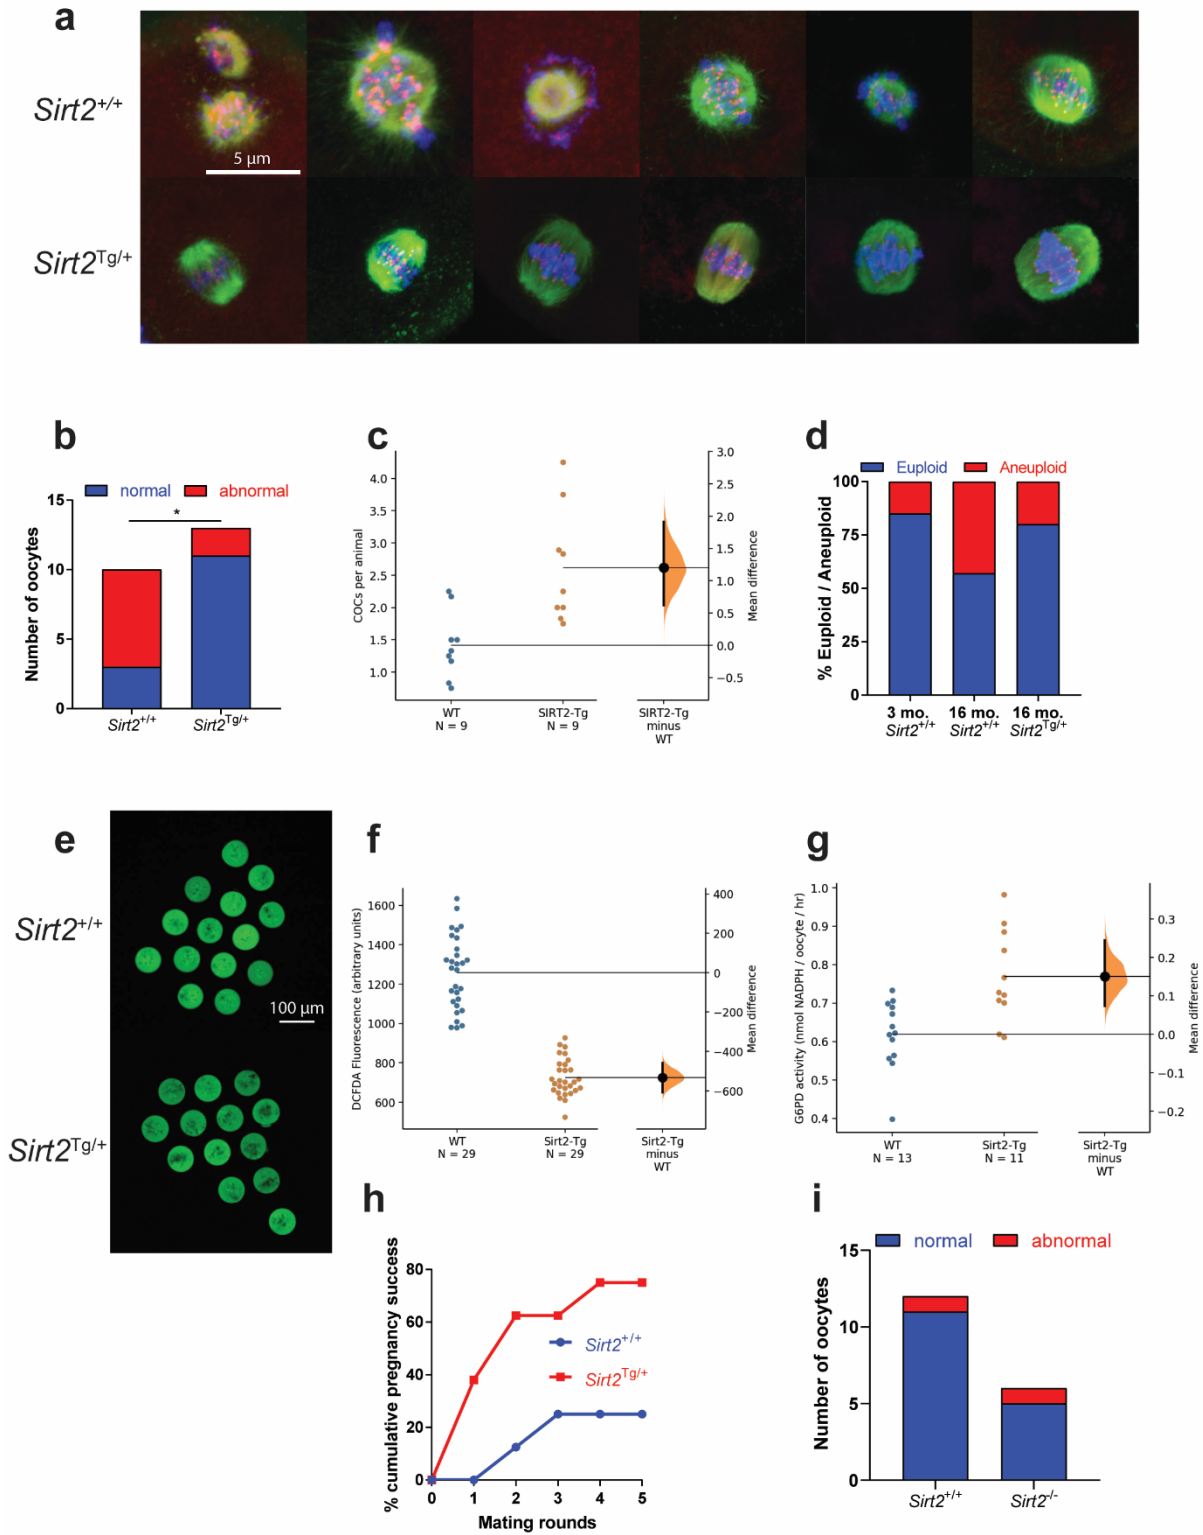

4

1 **Figure 4. SIRT2 overexpressing transgenic mice have improved oocyte quality.** GV stage  
2 oocytes were recovered from 14 month-old *Sirt2*<sup>Tg/+</sup> C57BL6 mice and matured *in vitro* to the  
3 MII stage, following which they were subjected to (a) Immunostaining for spindle assembly  
4 ( $\beta$ -tubulin in green, Hoescht for DNA in blue, kinetochores (ACA) in red), with (b) a  
5 quantitative improvement in spindle assembly in *Sirt2*<sup>Tg/+</sup> transgenics compared to *Sirt2*<sup>+/+</sup>  
6 littermates (n=10-13 oocytes per group). c, Oocyte yield from reproductively aged (14 month  
7 old) PMSG stimulated *Sirt2*<sup>Tg/+</sup> and wild-type *Sirt2*<sup>+/+</sup> littermates (\*\*p=0.0030, n=9 animals  
8 per group). d, Aneuploidy rates in oocytes from young (2 month old) and aged (16 month old)  
9 *Sirt2*<sup>Tg/+</sup> and wild-type *Sirt2*<sup>+/+</sup> littermates (n=30 young wild-type, 7 *Sirt2*<sup>+/+</sup> and 5 *Sirt2*<sup>Tg/+</sup>  
10 oocytes from 4 animals per group). Oocytes from *Sirt2*<sup>Tg/+</sup> mice had decreased ROS levels as  
11 determined by (e) H<sub>2</sub>DCFDA staining, quantified in (f), due in part to (g) increased G6PD  
12 enzyme activity (each data point represents 5 pooled oocytes from 4 animals per group). h,  
13 Timed mating trials starting from 15 months of age to determine cumulative pregnancy rates,  
14 as determined by ultrasound imaging of a foetal heartbeat (p=0.1319 after 5 mating rounds,  
15 n=8 animals per group). SIRT2 is sufficient, but necessary for oocyte integrity as (i) oocytes  
16 from 5 to 6-month old *Sirt2*<sup>-/-</sup> knockout animals display normal spindle assembly when as  
17 assessed as in (a). Data analysed by two-sided Fisher's exact test in (b) and (h). Full statistical  
18 analyses in Extended Data Table 1 and Supplementary Information.

19

20

21

22

23

24

25



1

2

3

4 **Figure 5**

**a**

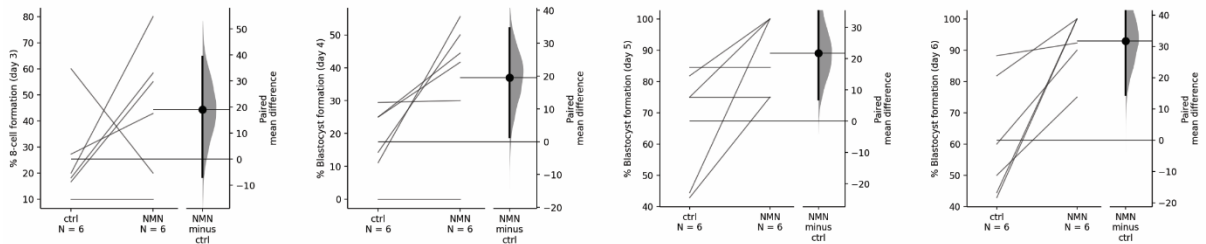

**b**

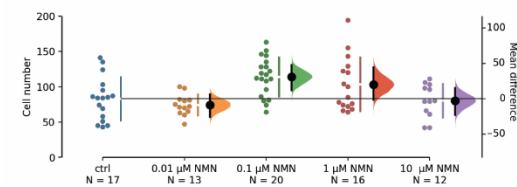

**c**

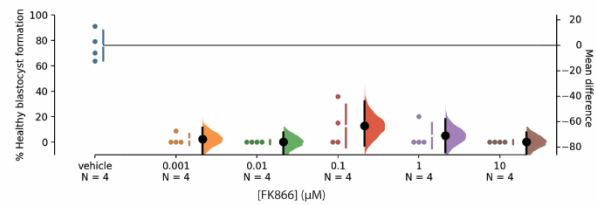

**d**

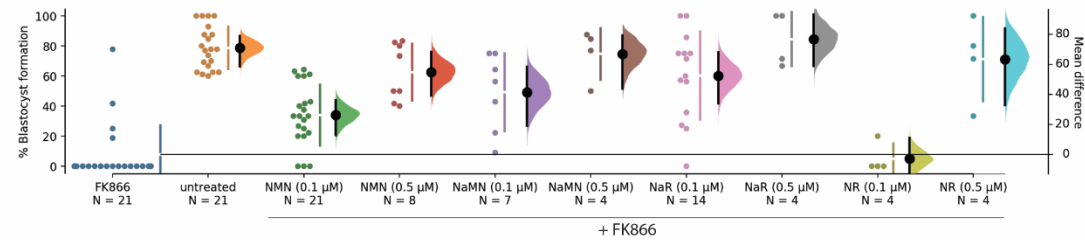

**e**

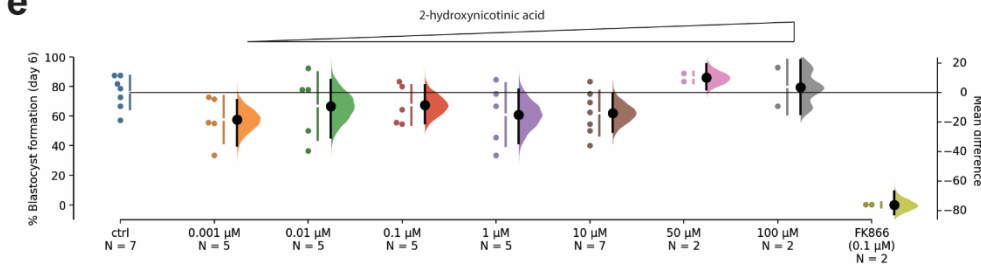

5

6 **Figure 5. *In vitro* NMN treatment enhances embryo formation under aged or challenged**

7 **conditions. MII oocytes from (a) aged (12 month old) mice were subjected to IVF, and post-**

8 **fertilisation embryos maintained in media containing 1 μM NMN until day 6 of embryo**

1 development, with the percentage of embryos reaching developmental milestones (8-cell or  
2 blastocyst) shown for days 3-6. The addition of NMN could also enhance cell count at 92 hr in  
3 blastocysts from young animals matured in **(b)** simple defined media, which induces culture  
4 stress. **c**, Treatment with the NAMPT inhibitor FK866 at the indicated concentrations causes  
5 embryo death at day 6 (% surviving blastocysts shown), which **(d)** can be rescued by treatment  
6 with the NAD<sup>+</sup> precursors NMN, nicotinic acid mononucleotide (NaMN), nicotinic acid  
7 riboside (NaR) and nicotinamide riboside (NR). **e**, Treatment with the NaPRT inhibitor 2-  
8 hydroxynicotinic acid has a minimal effect on blastocyst formation, compared to FK866  
9 treatment (day 6 data shown).

10  
11  
12  
13  
14  
15  
16  
17  
18  
19  
20  
21  
22  
23  
24  
25  
26  
27

1

2

3

4 **Figure 6**

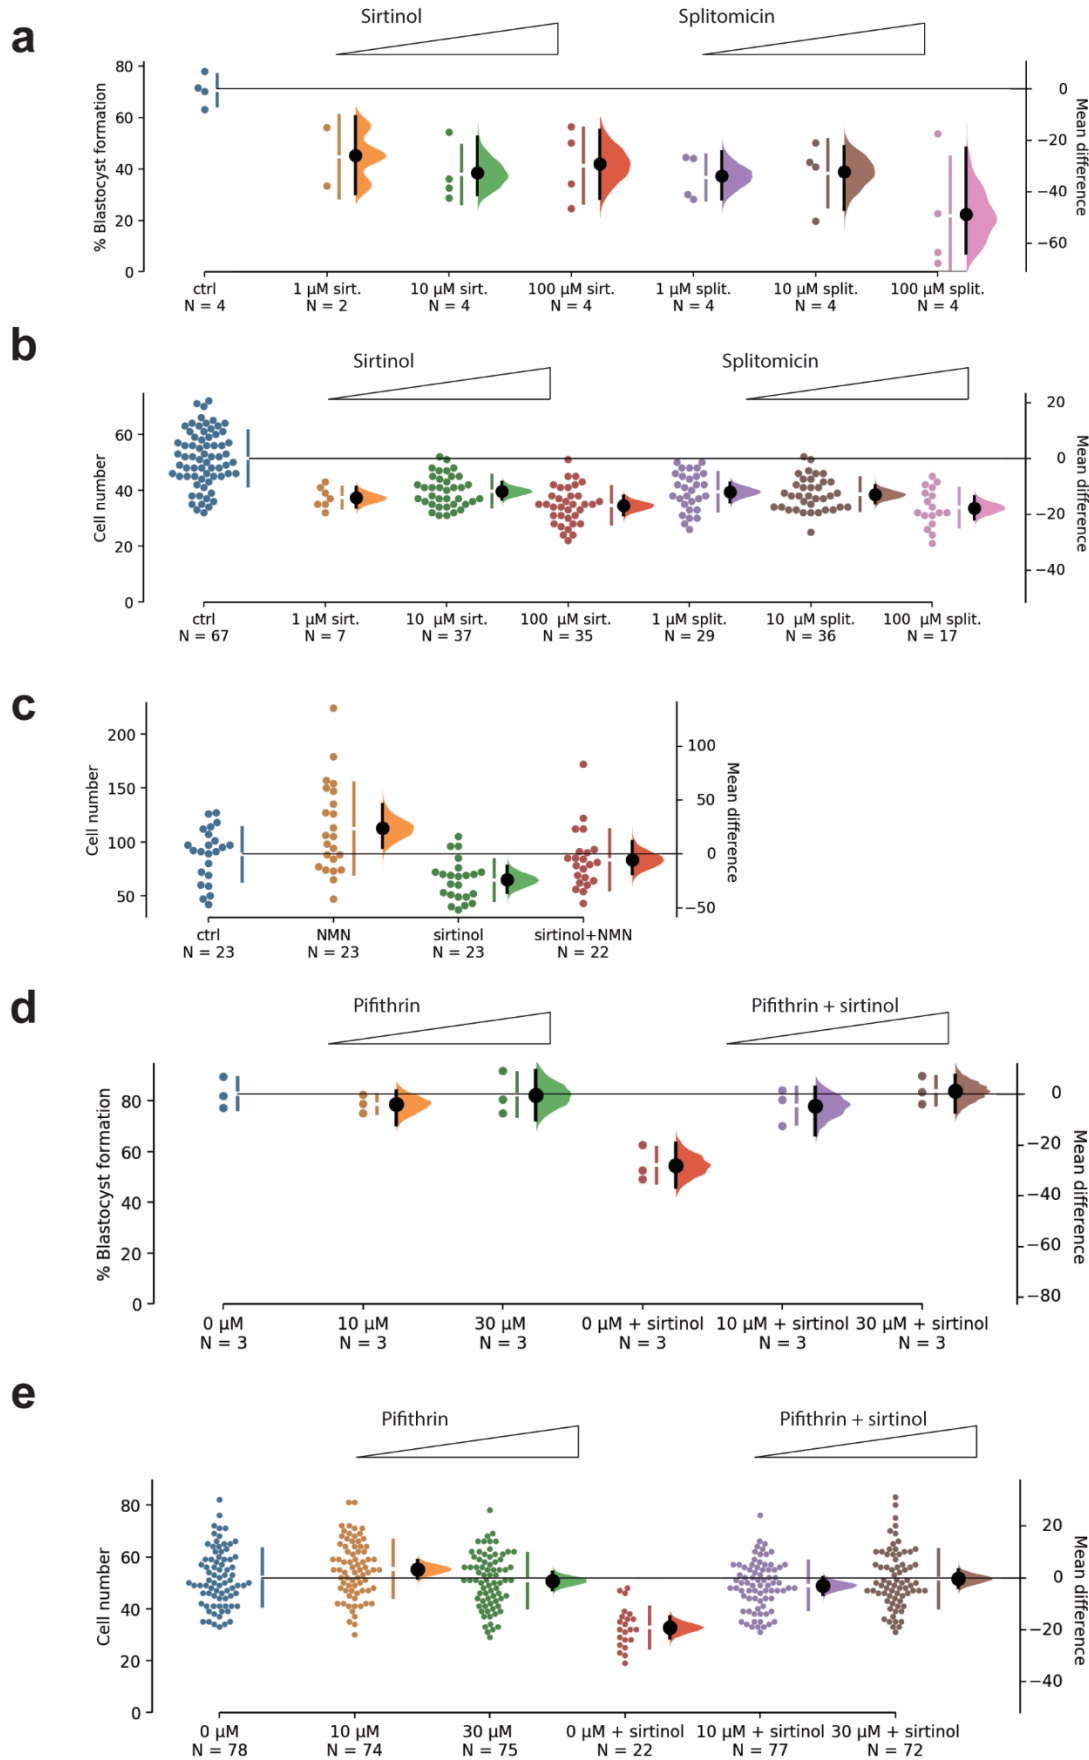

1 **Figure 6. Benefits of NMN to blastocyst formation are independent of sirtuin activity,**  
2 **which is required for p53 dependent embryo formation.** Treatment with the small molecule  
3 sirtuins inhibitors sirtinol or splitomicin (**a**) inhibits blastocyst formation, with (**b**) decreased  
4 cell count in those blastocysts that are formed. **c**, Co-treatment of sirtinol treated embryos with  
5 NMN rescues this reduction in cell count, indicating that the benefits of NMN are partially  
6 independent of sirtuins activity. Treatment with the p53 inhibitor pifithrin rescues (**d**)  
7 blastocyst formation and (**e**) cell count in embryos treated with sirtinol. Data from embryos  
8 maintained in defined simple media, fixed at 92 hr post-fertilisation.

9

10

11

## Extended Data Figure 1

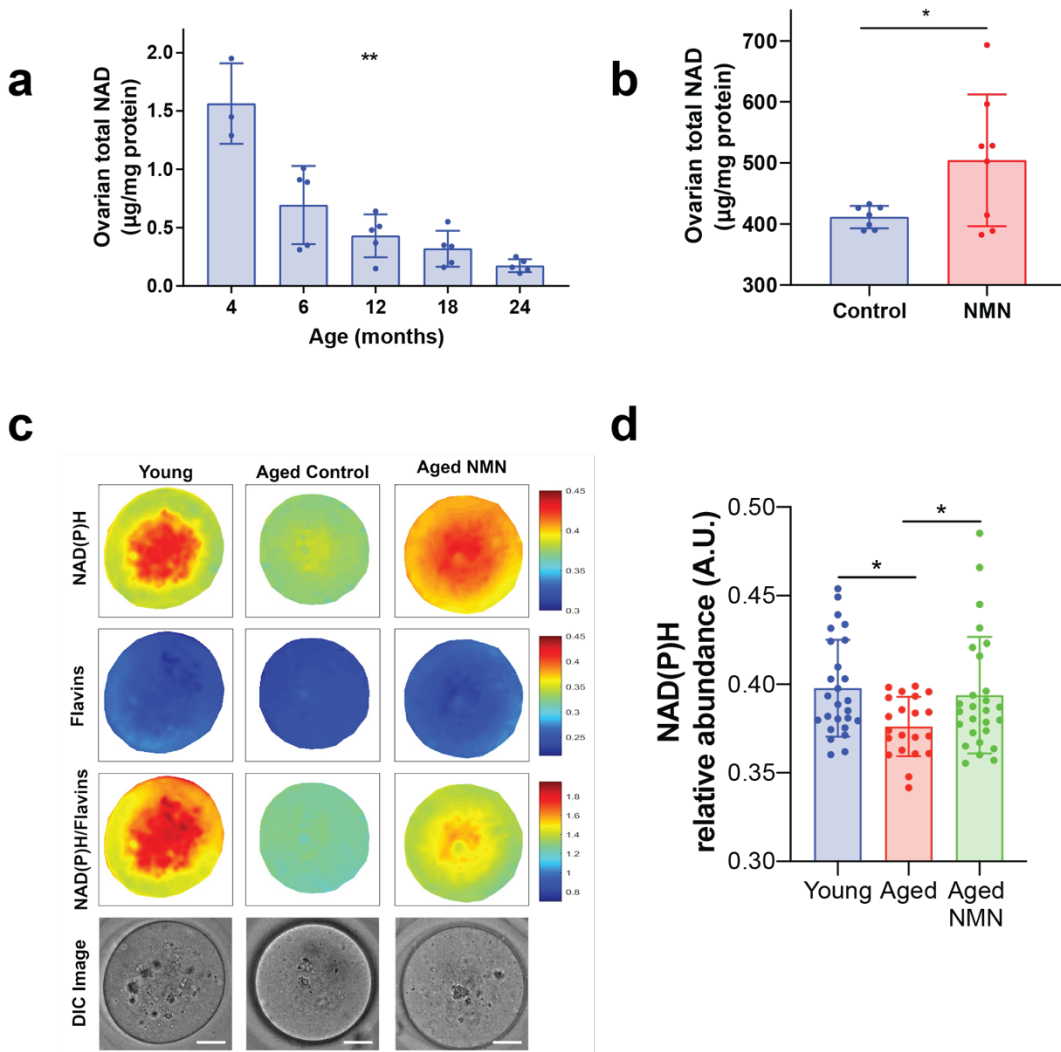

### Extended Data Figure 1. Data from main text Figure 1 presented using traditional null-hypothesis statistics testing.

**a**, Ovarian levels of NAD<sup>+</sup> in the mouse declines with age (\*\* $p=0.0055$ ,  $n=3-5$  per age), which **(b)** can be partially restored in 10 month-old mice following acute treatment (500 mg/kg, 2 hr, oral gavage) with NMN (\* $p=0.0433$ ,  $n=6-7$  per group). **c** Multispectral imaging was used to exploit the endogenous fluorescence properties of NADH and NADPH to determine NAD(P)H content in oocytes from young (4-5 weeks old) or aged (12-month old) animals treated with or without NMN through addition to drinking water (2 g/L) for four weeks (scale bar is 20 microns), quantified in **d**. Data analysed by one-way ANOVA in **(a)** and **(d)** with Holm-Sidak post-test in **(d)**, analysed by two-way  $t$ -test in **(b)**.

## Extended Data Figure 2

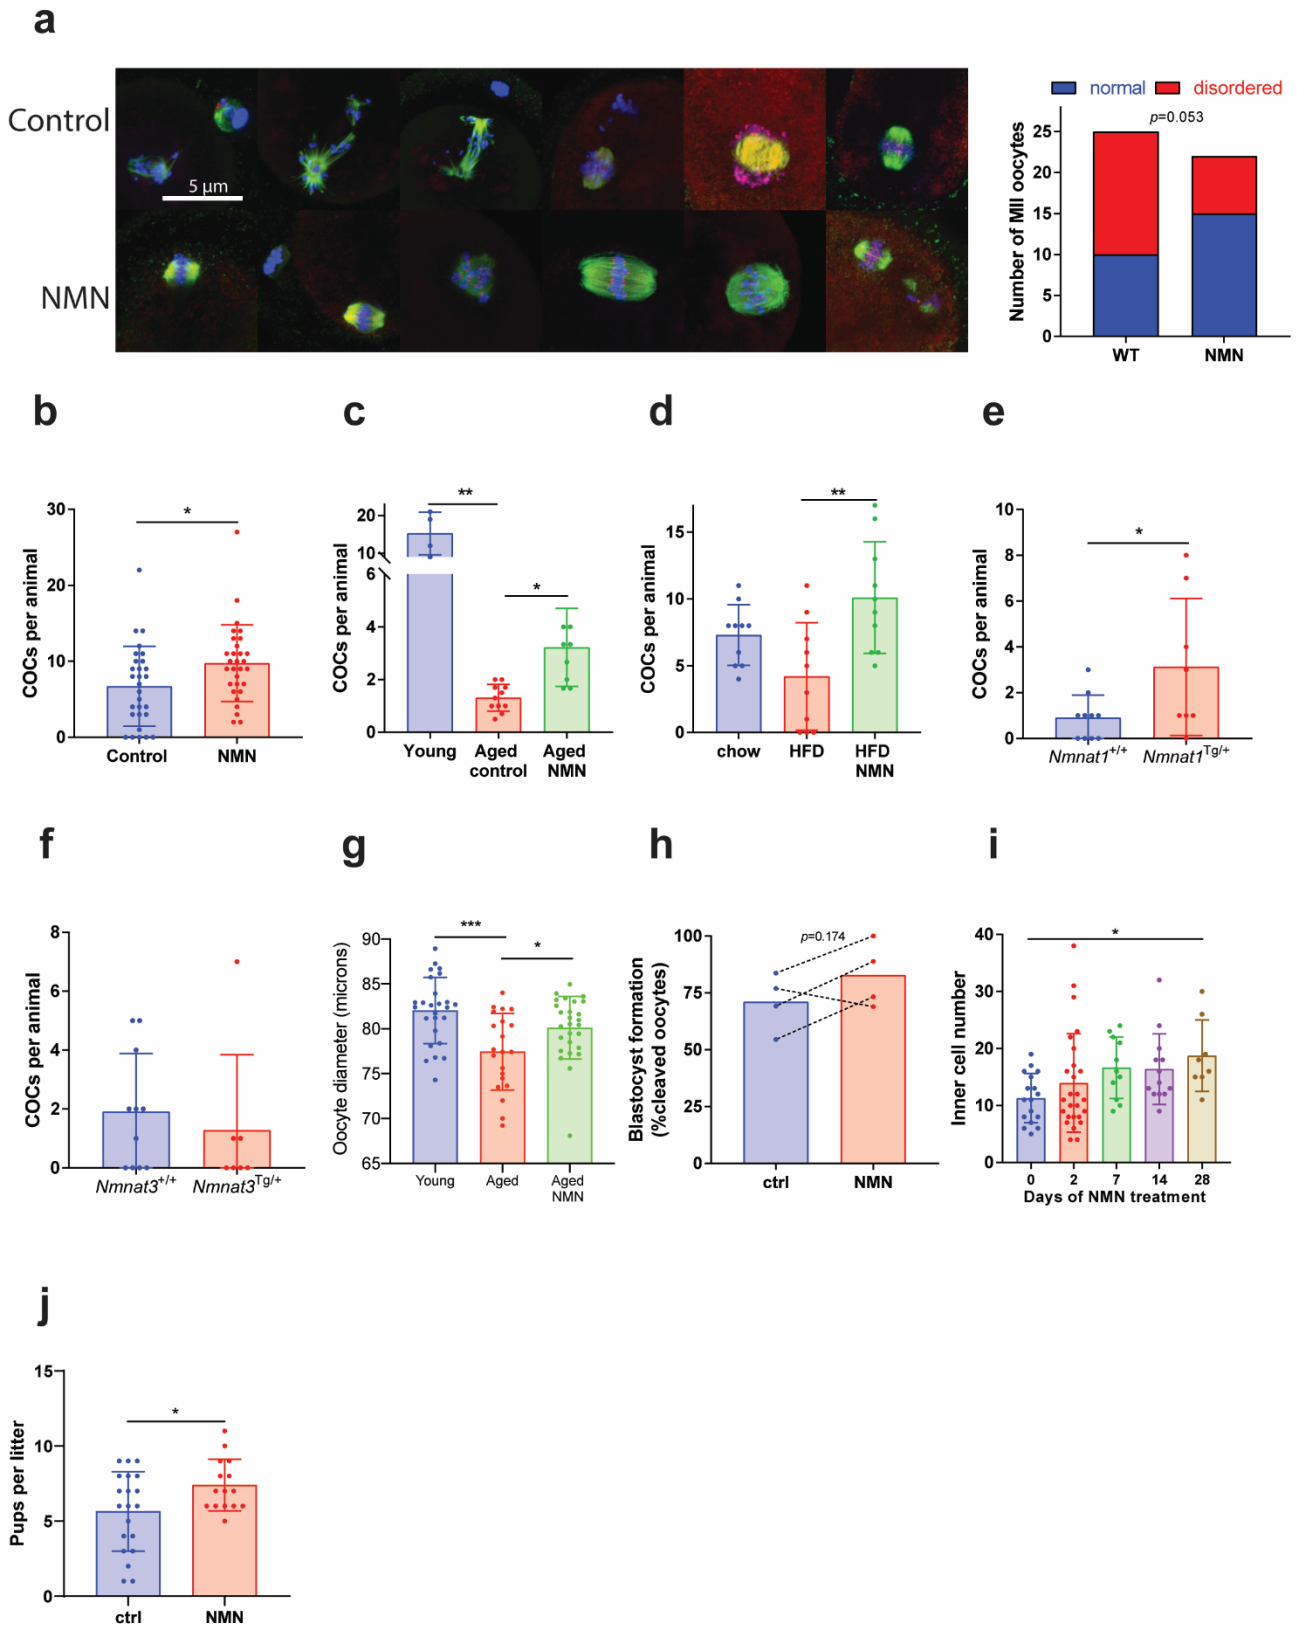

Extended Data Figure 2. Data from main text Figure 1 presented using traditional null-hypothesis statistics testing. Chronic treatment (drinking water, 2 g/L, 4 weeks) with NMN from the age of 14 months (a) restores spindle assembly in immunostained oocytes ( $\beta$ -tubulin in green,

Hoescht for DNA in blue, kinetochores (ACA) in red,  $p=0.0503$  by  $\chi^2$  test). Treatment with NMN improves oocyte yield following ovarian stimulation in (b) aged (12 month old) C57BL6 mice ( $*p=0.0211$ ,  $n=29-30$  animals per group), (c) 14-16 month old Swiss albino mice ( $***p=0.0004$ ,  $*p=0.0295$   $n=4-11$  per group), and (d) high fat diet (HFD) fed Swiss albino mice after 5-6 months of feeding ( $**p=0.0031$ ,  $F=6.746$   $n=10$  per group). e, Aged (12-14 month) transgenic mice overexpressing the nuclear  $\text{NAD}^+$  biosynthetic enzyme NMNAT1 have increased oocyte yield from ovaries following PMSG stimulation ( $*p=0.0416$ ,  $n=8-10$  per group), in comparison to (f) aged (12-14 month) transgenics overexpressing the mitochondrial  $\text{NAD}^+$  biosynthetic enzyme NMNAT3. g. Following 4 weeks of NMN treatment (2 g/L, drinking water) in aged (12-month old) or young (4-6 week old) C57BL6 females, MII oocytes were collected following PMSG and hCG stimulation and oocyte diameter assessed. In a separate cohort of 12-month old animals, mature oocytes were used for IVF, with h comparisons of percentage blastocyst formation at day 6 of embryo development shown as a slopegraph with each line representing a separate experimental cohort. i. 12 month-old C57BL6 females were treated for the indicated times with NMN in drinking water (2 g/L), and MII oocytes collected following PMSG and hCG stimulation and subjected to IVF. At day 6, embryos were fixed and differentially stained to assess inner cell mass. Data analysed by Kruskal Wallis test in (a) and (g); Mann-Whitney U-test in (e), one-way ANOVA with Holm-Sidak in (c), (d), (g) and (i), unpaired two-tailed t-test in (f). Data presented as mean  $\pm$  s.d; individual data points are shown. Further statistical detail in Extended Data Table 1 and Supplementary Information.



### Extended Data Figure 3

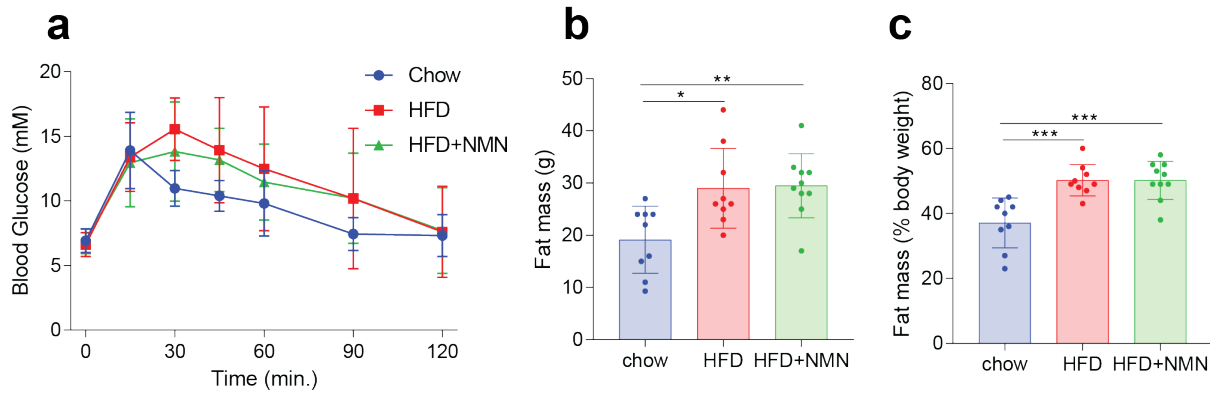

### Extended Data Figure 3. Obesity and metabolic dysfunction in high fat diet (HFD) fed animals.

Swiss albino mice were maintained on a standard chow or HFD for 5-6 months in the presence or absence of NMN treatment (2 g/L, drinking water). **a**, Glucose tolerance test (2 g/kg, i.p.), **(b)** quantitative MRI for fat mass, and **(c)** fat mass expressed as a percentage of total body weight.  $n=9-10$  animals per group,  $**p<0.01$  one-way ANOVA with Hold-Sidak multiple comparison test. Data are mean  $\pm$  s.d. Further statistical detail in Extended Data Table 1.

## Extended Data Figure 4

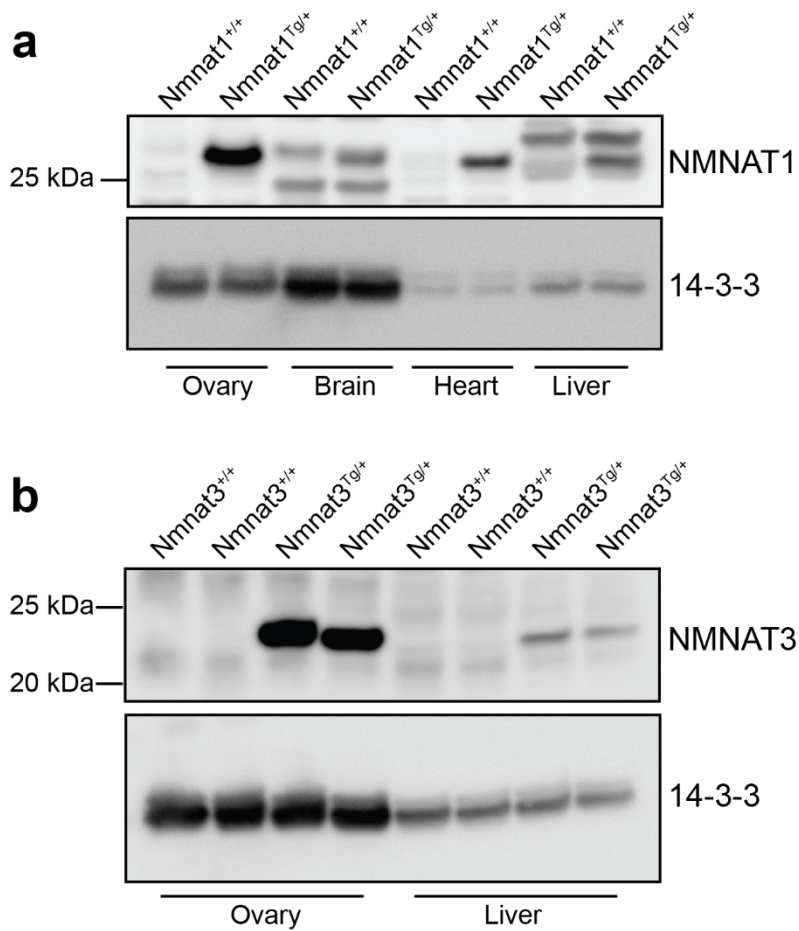

### Extended Data Figure 4. Transgenic overexpression of NMNAT1 and NMNAT3 in ovaries.

Western blot for (a) NMNAT1 in the ovaries of *Nmnat1*<sup>Tg/+</sup> animals, and (b) NMNAT3 in the ovaries of *Nmnat3*<sup>Tg/+</sup> animals. Each lane represents tissue from a separate animal.

## Extended Data Figure 5

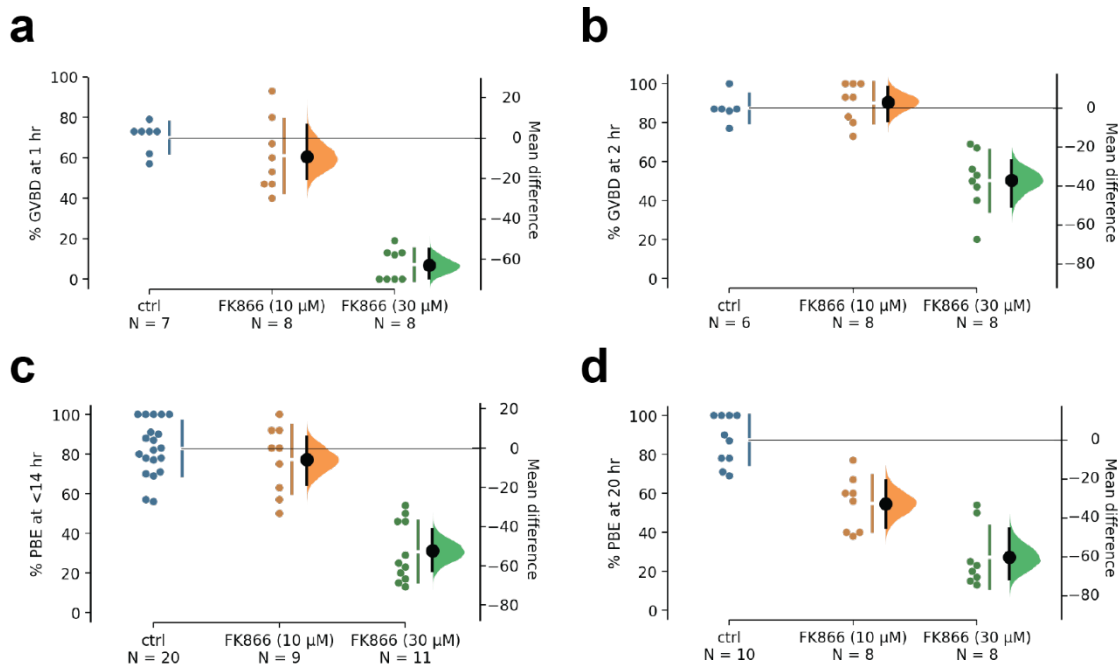

**Extended Data Figure 5. Inhibition of NAD synthesis slows meiotic progression.** GV stage oocytes collected from 8-week old C57BL6 females were treated with the indicated concentrations of the NAMPT inhibitor FK866, and meiotic progression assessed. FK866 reduced germinal vesicle breakdown (GVBD) at (a) 1 hr and (b) 2 hr, as well as polar body extrusion (PBE) at (c) 14 hr and (d) 20 hr.

## Extended Data Figure 6

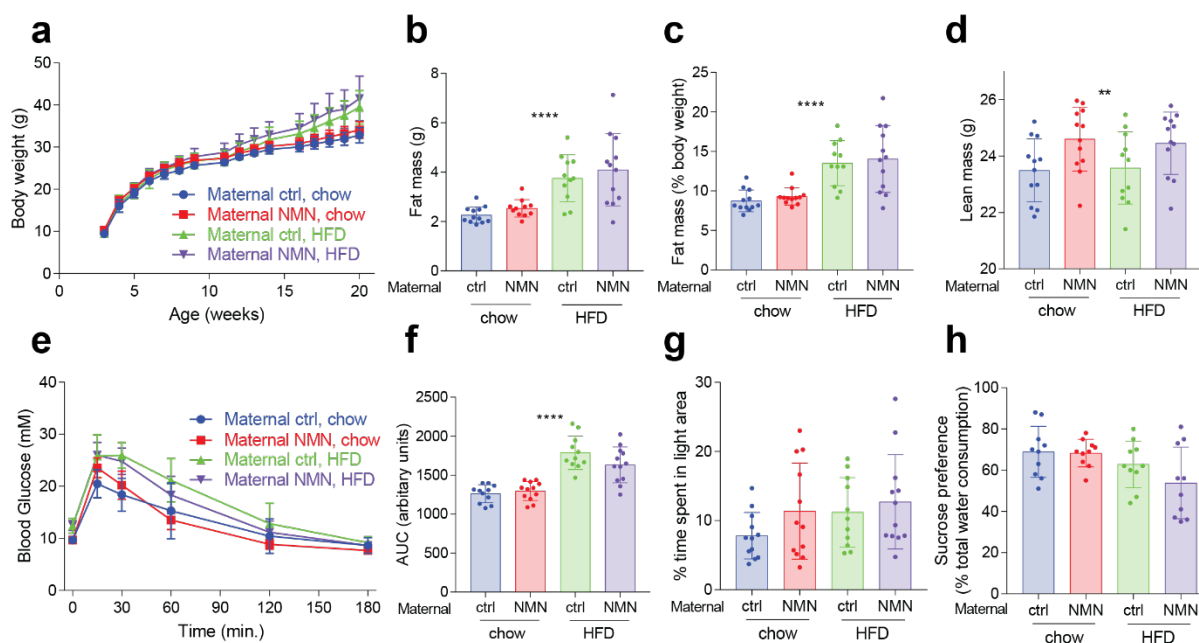

**Extended Data Figure 6. Maternal NMN treatment does not impact growth, metabolism or behaviour in offspring.** Male offspring from females treated with or without NMN were maintained on standard chow or high fat diets (HFD). **a**, Body weight was measured on an ongoing basis. **b**, Fat mass and **(c)** lean body mass, also expressed as **(d)** body composition were assessed by quantitative MRI, with a difference in fat mass from HFD but no effect of maternal NMN treatment (\*\*\*\* $p < 0.0001$  diet effect, diet  $F = 32$ ), and a small but significant increase in lean body mass (\*\* $p = 0.0054$  maternal NMN effect, diet  $F = 0.0096$ , maternal NMN  $F = 8.604$ ) with maternal NMN treatment. Metabolic homeostasis was measured by **(e)** glucose tolerance test, quantified by **(f)** area under the curve (AUC) (\*\*\*\* $p < 0.0001$ , diet effect). Behaviour was assessed by the **(g)** light/dark box test for anxiety-like behaviour, and the **(h)** sucrose preference test for depression-like behaviour. 2-way ANOVA,  $n = 11-12$  per group. Data presented as mean  $\pm$  s.d. Full statistical analyses in Extended Data Table 1.

## Extended Data Figure 7

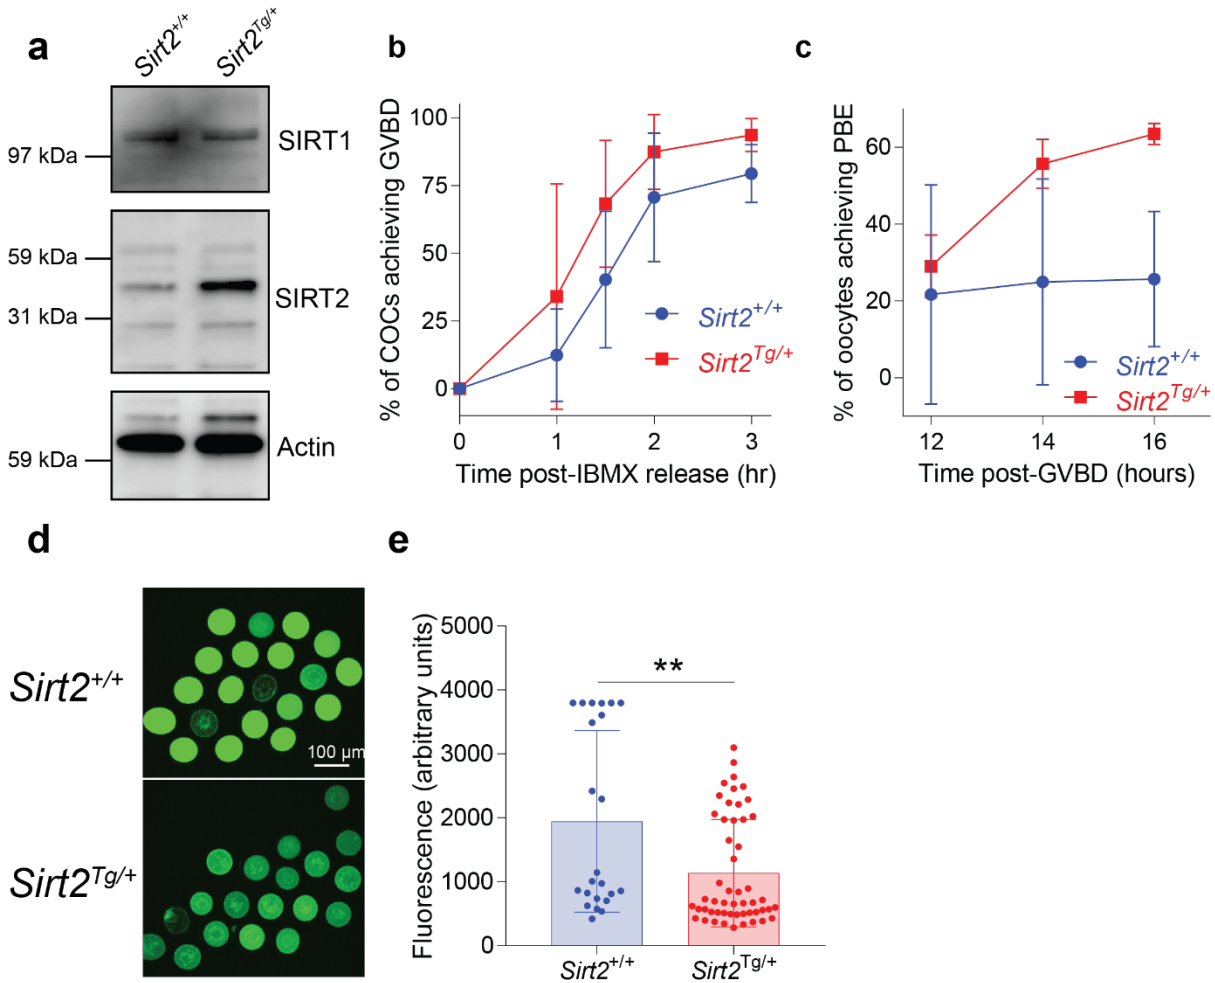

**Extended Data Figure 7. Data from Figure 4 presented using traditional null hypothesis statistics testing.** **a**, Western blot for SIRT2 in oocytes from whole body *Sirt2* overexpressing transgenic mice (40 oocytes per lane). **b**, Germinal vesicle breakdown and **(c)** polar body extrusion rates in oocytes from 14-month old *Sirt2*<sup>Tg/+</sup> or wild-type *Sirt2*<sup>+/+</sup> littermates, at indicated timepoints ( $n=3-5$  experiments). **d**, Oocytes from *Sirt2*<sup>Tg/+</sup> animals have improved resistance to reactive oxygen species (ROS) challenge following H<sub>2</sub>O<sub>2</sub> treatment compared to oocytes from wild-type *Sirt2*<sup>+/+</sup> littermates, as measured by H<sub>2</sub>DCFDA staining, quantified in **e** (\*\* $p=0.0024$ ,  $n=23-52$  oocytes per group). Data are mean  $\pm$  s.d. Further statistical detail in Extended Data Table 1.

## Extended Data Figure 8

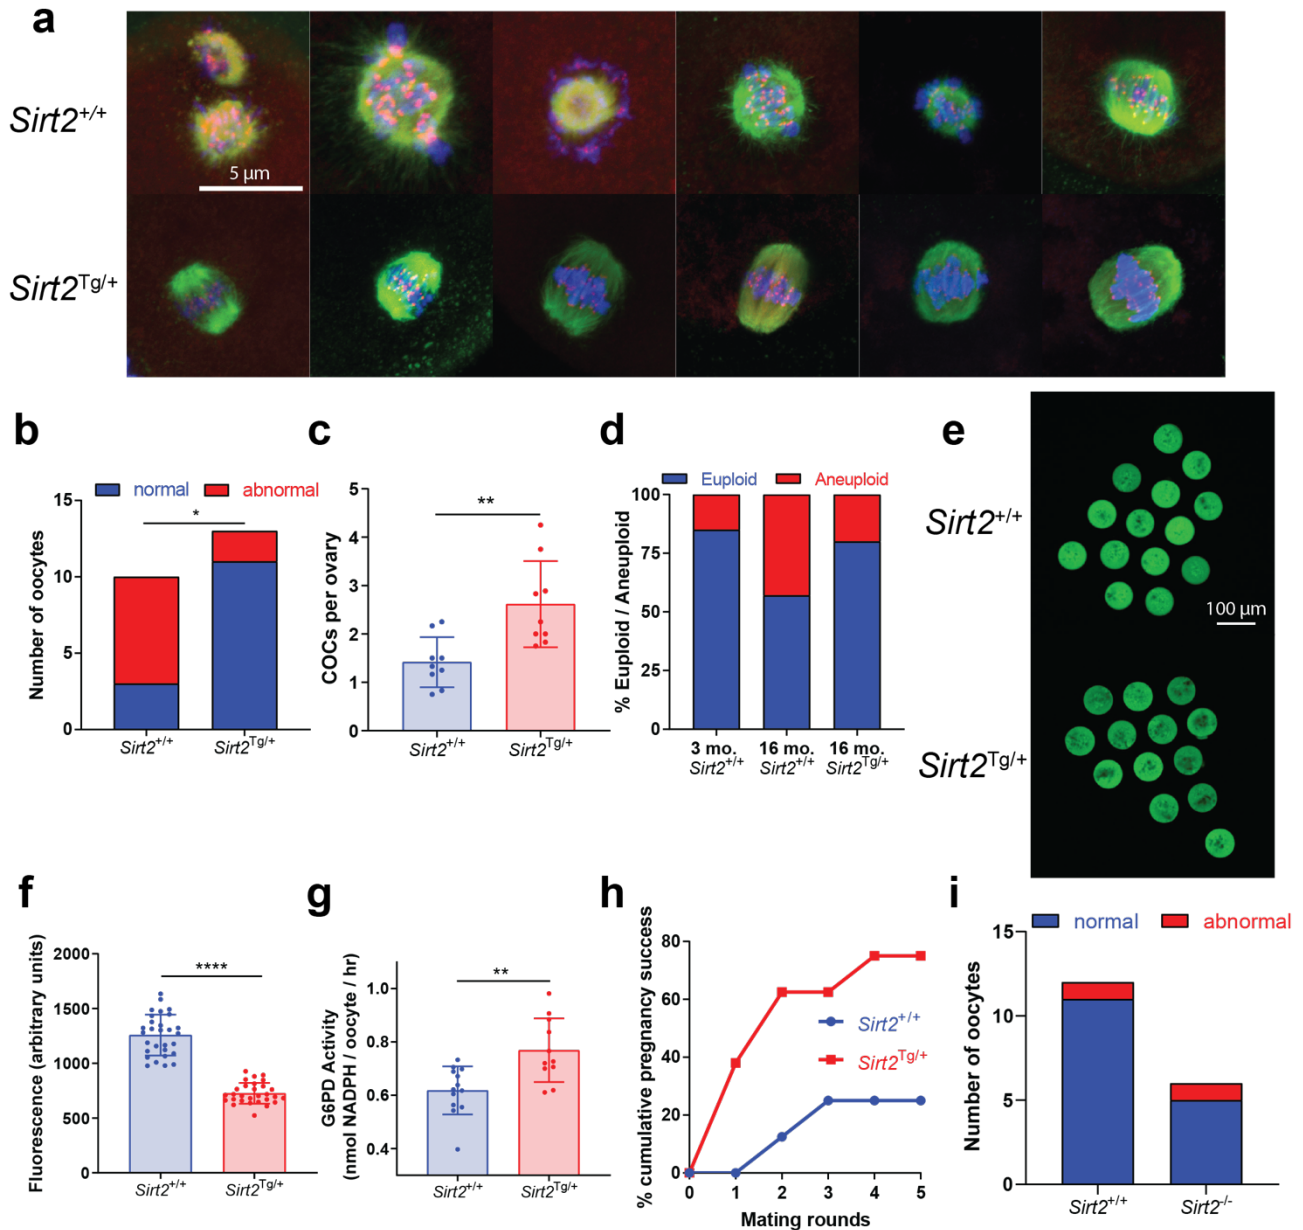

**Extended Data Figure 8. Data from main text Figure 4 presented using traditional null-hypothesis statistics testing.**

GV stage oocytes were recovered from 14 month-old *Sirt2*<sup>Tg/+</sup> C57BL6 mice and matured in vitro to the MII stage, following which they were subjected to (a) Immunostaining for spindle assembly ( $\beta$ -tubulin in green, Hoescht for DNA in blue, kinetochores (ACA) in red), with (b) a quantitative improvement in spindle assembly in *Sirt2*<sup>Tg/+</sup> transgenics compared to *Sirt2*<sup>+/+</sup> littermates (n=10-13 oocytes per group). c, Oocyte yield from reproductively aged (14 month old) PMSG stimulated

*Sirt2*<sup>Tg/+</sup> and wild-type *Sirt2*<sup>+/+</sup> littermates (\*\**p*=0.0030, *n*=9 animals per group). **d**, Aneuploidy rates in oocytes from young (2 month old) and aged (16 month old) *Sirt2*<sup>Tg/+</sup> and wild-type *Sirt2*<sup>+/+</sup> littermates (*n*=30 young wild-type, 7 *Sirt2*<sup>+/+</sup> and 5 *Sirt2*<sup>Tg/+</sup> oocytes from 4 animals per group). Oocytes from *Sirt2*<sup>Tg/+</sup> mice had decreased ROS levels as determined by **(e)** H<sub>2</sub>DCFDA staining, quantified in **(f)** (\*\*\*\**p*<0.0001, *n*=29 oocytes from four 3-4 month old animals per group), due in part to **(g)** increased G6PD enzyme activity (\*\**p*=0.0019, *n*=11-13, each data point represents 5 pooled oocytes from 4 animals per group). **h**, Timed mating trials starting from 15 months of age to determine cumulative pregnancy rates, as determined by ultrasound imaging of a foetal heartbeat ( $\chi^2$  test *p*=0.1319 after 5 mating rounds, *n*=8 animals per group). SIRT2 is sufficient, but necessary for oocyte integrity as **(i)** oocytes from *Sirt2*<sup>-/-</sup> knockout animals display normal spindle assembly when as assessed as in **(a)**. Data analysed by two-sided Fisher's exact test in **(b)** and **(h)**, two-tailed Student's t-test in **(c)**, **(f)** and **(g)**. Data are mean  $\pm$  13 s.d; individual data points are shown. Full statistical analyses in Extended Data Table 1 and Supplementary Information.

## Extended Data Fig. 9

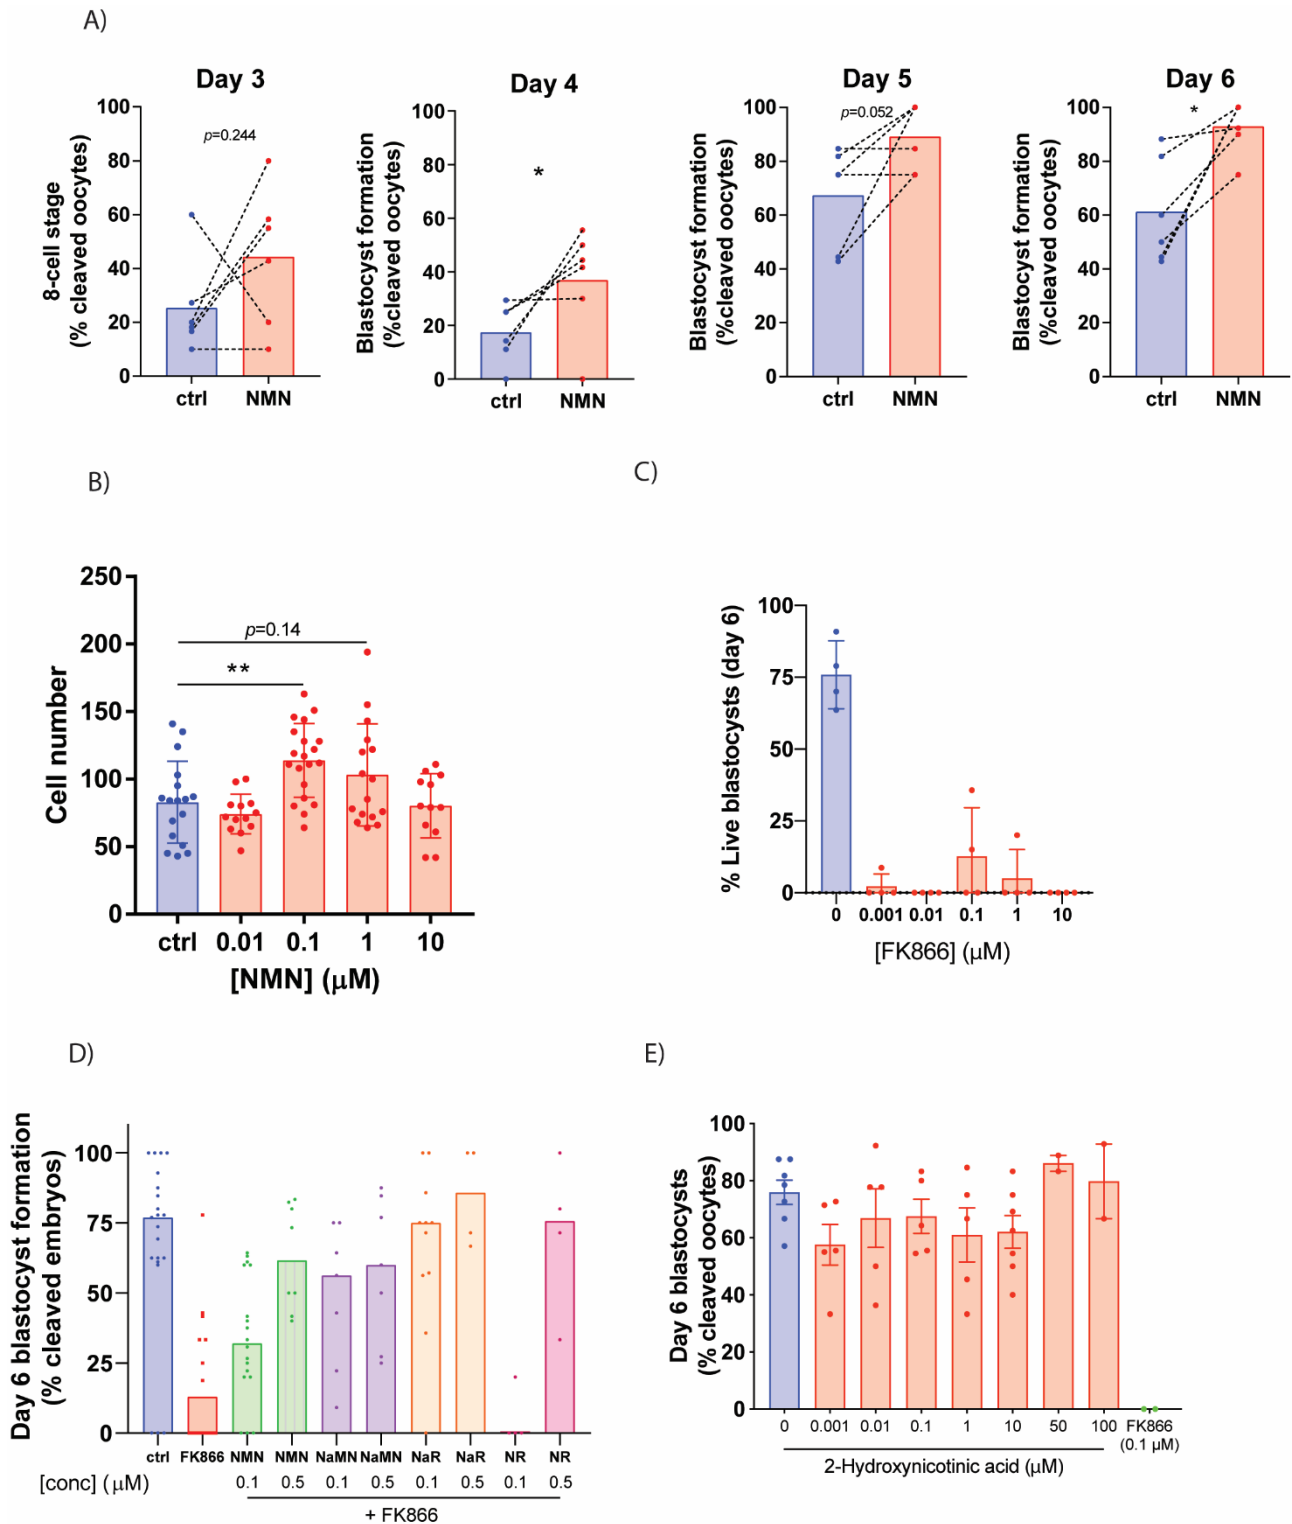

**Extended Data Fig. 9. Data from Figure 5 presented using traditional null hypothesis statistics testing.** MII oocytes from (a) aged (12 month old) mice were subjected to IVF, and post-fertilisation embryos maintained in media containing 1  $\mu\text{M}$  NMN until day 6 of embryo development, with the percentage of embryos reaching developmental milestones (8-cell or blastocyst) shown for days 3-6.



The addition of NMN could also enhance cell count at 92 hr in blastocysts from young animals matured in **(b)** simple defined media, which induces culture stress. **c**, Treatment with the NAMPT inhibitor FK866 at the indicated concentrations causes embryo death at day 6 (% surviving blastocysts shown), which **(d)** can be rescued by treatment with the NAD precursors NMN, nicotinic acid mononucleotide (NaMN), nicotinic acid riboside (NaR) and nicotinamide riboside (NR). **e**, Treatment with the NaPRT inhibitor 2-hydroxynicotinic acid has a minimal effect on blastocyst formation, compared to FK866 treatment (day 6 data shown). Data analysed in **a** by paired two-tailed t-test, in **b** by one-way ANOVA with Hold-Sidak multiple comparison test. Data are mean  $\pm$  s.d. \*\* $p < 0.01$

## Extended Data Fig. 10

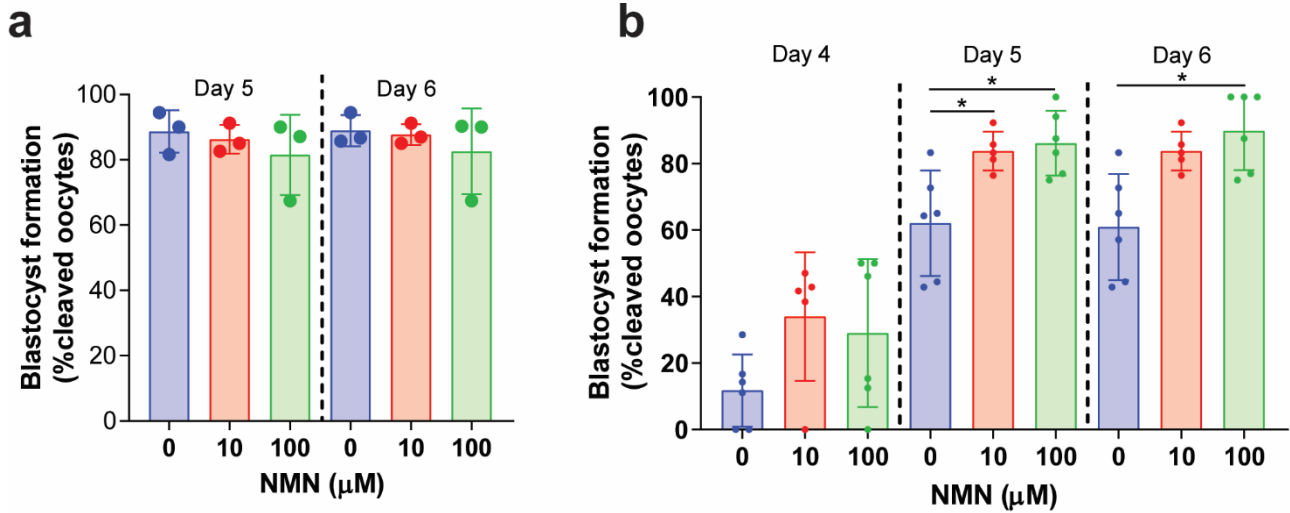

### Extended Data Fig. 10. NMN enhances embryo formation from aged but not young females.

Oocytes from (a) 4-week old or (b) 12-month old females were subjected to IVF, with the addition of NMN at indicated concentrations to embryo media. Blastocyst formation rates were assessed as indicated. Data analysed within each day by one-way ANOVA with Kruskal-Wallis multiple comparison. Day 5, 0 vs 10,  $p=0.0466$ ; 0 vs 100,  $p=0.0132$ . Day 6, 0 vs 100,  $p=0.0100$ .

## Extended Data Fig. 11

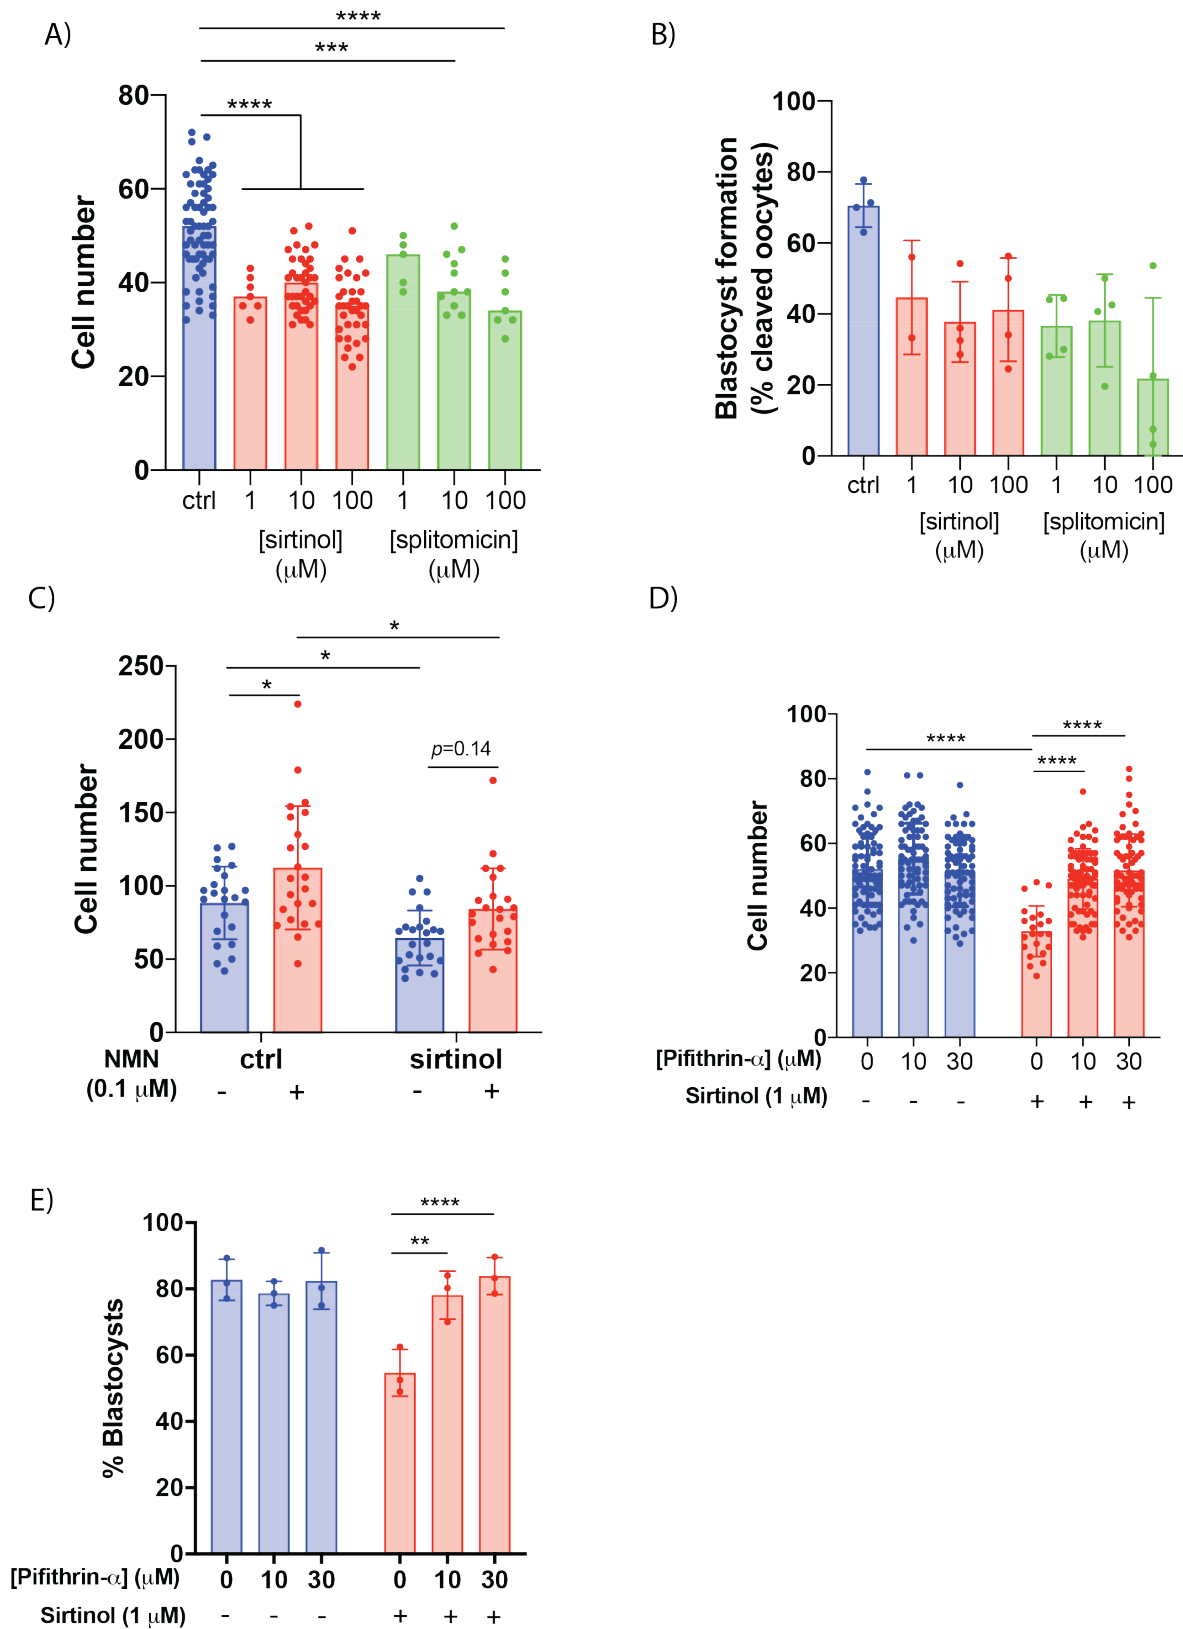

**Extended Data Fig. 11. Data from main text Fig. 6 presented using traditional null hypothesis statistics testing.** Treatment with the small molecule sirtuin inhibitors sirtinol or splitomicin (**a**)

inhibits blastocyst formation, with **(b)** decreased cell count in those blastocysts that are formed. **c**, Co-treatment of sirtinol treated embryos with NMN rescues this reduction in cell count, indicating that the benefits of NMN are partially independent of sirtuins activity. Treatment with the p53 inhibitor pifithrin rescues **(d)** blastocyst formation and **(e)** cell count in embryos treated with sirtinol. Data from embryos maintained in simple defined media, fixed at 92 hr post-fertilisation. Data are analysed in **a**, **d**, **e** by one-way ANOVA with Holm-Sidak multiple comparison test, in **c** by 2-way ANOVA with Sidak's multiple comparison test. \* $p < 0.05$ , \*\*\*\* $p < 0.0001$ .
